# Supplementary material for: Weevil pgrp-lb prevents endosymbiont TCT dissemination and chronic host systemic immune activation
Source: PubMed Central journal article supplement — Proc Natl Acad Sci U S A. 2019 Feb 28;116(12):5623–32. doi: 10.1073/pnas.1821806116 (PMC6431197; doi:10.1073/pnas.1821806116), 2019-02-28
Supplement: pnas.1821806116.sapp.pdf [file pnas.1821806116.sapp.pdf]

## Supplementary Information for

**Weevil *pgrp-lb* prevents endosymbiont TCT dissemination and chronic host systemic immune activation**

Justin Maire, Carole Vincent-Monégat, Séverine Balmand, Agnès Vallier, Mireille Hervé, Florent Masson, Nicolas Parisot, Aurélien Vigneron, Caroline Anselme, Jackie Perrin, Julien Orleans, Isabelle Rahioui, Pedro Da Silva, Marie-Odile Fauvarque, Dominique Mengin-Lecreux, Anna Zaidman-Rémy\*, Abdelaziz Heddi\*

Paste corresponding author name here: Abdelaziz Heddi and Anna Zaidman-Rémy  
[abdelaziz.heddi@insa-lyon.fr](mailto:abdelaziz.heddi@insa-lyon.fr) (A.H.), [anna.zaidman@insa-lyon.fr](mailto:anna.zaidman@insa-lyon.fr) (A.Z.-R.).

**This PDF file includes:**

- Supplementary Material and Methods
- Figs. S1 to S7
- Tables S1 to S3
- Supplementary sequences
- References for SI reference citations

**Other supplementary materials for this manuscript include the following:**

## Supplementary Information Text

### Supplementary Material and Methods

#### Multiple sequence alignments

Multiple sequence alignments were performed using the Clustal Omega program [1]. Uniprot accession numbers are as follows: *Sodalis pierantonius* MurE: W0HJN2; *Escherichia coli* MurE: P22188; *Bacillus subtilis* MurE: Q03523; *Helicobacter pylori* MurE: E1S713; *Pseudomonas aeruginosa* MurE: A0A0F6UH44; *Vibrio cholera* MurE: Q9X6N4; *Staphylococcus aureus*: Q2FZP6 MurE; *Streptococcus pneumonia* MurE: A0A0E8T7T8; *Enterococcus faecalis* MurE: Q838A4; *Glossina morsitans* PGRP-LB: A0A1B0G8B0; *Drosophila melanogaster* PGRP-LB: Q8INK6; *Euprymna scolopes* PGRP2: Q32S45; *Drosophila melanogaster* PGRP-LCx: Q9GNK5-2; *Drosophila melanogaster* PGRP-SA: Q9VYX7; *Homo sapiens* PGLYRP1: O75594; *Homo sapiens* PGLYRP3: Q96LB9.

#### *S. pierantonius* PG analysis

300 bacteriomes from *S. zeamais* fourth instar larvae were dissected. This material was resuspended into 500 µl of 4.5% SDS solution at 95-100°C and extraction was continued for one hour at this temperature under agitation. PG-containing pellets were recovered by centrifugation at 200,000 g for 30 min at room temperature with a Beckman TL-100 centrifuge and they were subsequently washed several times with water. The final pellets were resuspended in 400 µL of 6 M HCl and hydrolysis was performed for 16 h at 96°C. The amino acid and hexosamine composition of hydrolysates was then analyzed with a Hitachi L8800 amino acid analyzer (ScienceTec).

#### Sample Preparation for Histology

Samples were fixed in PFA 4%. After one week at 4°C, the fixative was replaced by several washings with PBS before embedding the tissue in 1.3% agar. Subsequently, samples were dehydrated through a graded ethanol (EtOH) series and transferred to butanol-1, at 4°C, overnight. Samples in agar were then embedded in melted Paraplast. Tissue sections (3 µm thick) were cut using an HM 340 E electronic rotary microtome (ThermoFisher Scientific). Sections were placed on poly-lysine-coated slides, dried overnight in a 37°C oven, and stored at 4°C prior to further treatments.

#### PGRP-LB Immunostaining

Paraffin sections were dewaxed twice in methylcyclohexane for 10 min, rinsed in EtOH 100°, and rehydrated through an ethanol gradient to PBS. Slides were incubated with 1% Bovine Serum Albumine (BSA) in PBS for 30 min prior to primary antibody incubation, overnight at 4°C. Rabbit polyclonal anti-serum directed against PGRP-LB (anti-PGRP-LB antibody, used in Vallier et al., 2009) was used as the primary antibody. Preimmune rabbit serum (J0) was used as a negative control. Antibody specificity was checked by western blot [2] and immunostainings

(Figure S7B) on RNAi *pgrp-lb* individuals. All antisera were diluted at 1:500 in PBS containing 0.1% BSA. After primary antiserum incubation, sections were washed with PBS containing 0.2% Tween. Primary antibodies were detected with fluorescent donkey anti-rabbit IgG, labeled with Alexa Fluor 488. This secondary antibody was applied for 1 h at room temperature, diluted at 1:600 in 0.1% BSA in PBS. They were washed with PBS-Tween, rinsed with PBS and washed several times with tap water. Sections were then dried and mounted using PermaFluor™ Aqueous Mounting Medium (ThermoFisher Scientific), together with 4,6-diamidino-2-phenylindole (DAPI, Sigma-Aldrich) for nuclear staining (3 µg/ml of medium). Images were acquired using an epifluorescence microscope (Olympus IX81), under specific emission filters: HQ535/50 for the green signal (antibody staining), D470/40 for the blue signal (DAPI) and HQ610/75 for the red signal (unspecific autofluorescence from tissue). Images were captured using an XM10 camera and the CellSens Software (Soft Imaging System). Images were treated using ImageJ (release 1.47v). For image treatment, each color channel was treated independently.

### **RNA isolation and libraries construction for RNA-seq**

For *S. oryzae*, RNA-seq datasets were retrieved from the Sequence Read Archive (SRX1034967-SRX1034972 and SRX3721133-SRX3721138). RNA-seq libraries for two other species, *S. zeamais* and *S. linearis* were constructed from a mix of two different pools of adult weevils, naïve and challenged with Gram-positive (*M. luteus*, strain CCM169) or Gram-negative (*D. dadantii*, strain A470) bacteria. Five individuals were randomly sampled at 6 h and 12 h post-injection for each bacterial challenge leading to a total of 20 adults per weevil species. Total RNA from these 20 adults was extracted with Trizol reagent (ThermoFisher Scientific) following the manufacturer's instructions. RNA was incubated with 1 U/µg of RQ1 RNase-free DNase (Promega) for 30 min, at 37°C then purified with the NucleoSpin RNA Clean-up kit (Macherey-Nagel). Total RNA concentration and quality were checked using the Qubit Fluorometer (ThermoFisher Scientific) and the Agilent 2200 TapeStation (Agilent Technologies). 20 naïve adults were randomly selected for *S. zeamais* and *S. linearis* weevil species and total RNA was extracted using the same procedure. Two different pools were prepared for the two weevil species respectively, by mixing 1 µg of RNA from naïve weevils with 1 µg of RNA from weevils challenged with bacteria. RNA-seq libraries were then prepared using the SENSE mRNA-seq library preparation kit (Lexogen) following the manufacturer's instructions and sequenced on an Illumina NextSeq500 platform (2x150bp, Illumina) at the sequencing platform of the IGFL (Institut de Génomique Fonctionnelle de Lyon, Ecole Normale Supérieure de Lyon, France).

### **Transcriptome assembly and identification of PGRP-LB transcripts**

The raw reads were first processed using cutadapt v1.16 [3] to remove adapters and trim low-quality ends ( $Q < 20$ ). Transcriptome assembly was performed using Trinity v2.3.2 [4] for each weevil species. *pgrp-lb* transcripts were identified using TBLASTN [5] with the *D. melanogaster* PGRP-LB protein sequence (Uniprot: Q8INK6) as query. All data from this study have been deposited at the NCBI Sequence Read Archive (SRA) under the following accession numbers: *S. zeamais*: SRP149413; *S. linearis*: SRP149424.

### **PCR amplification of *pgrp-lb* transcripts**

PCR amplification of *pgrp-lb* transcripts was performed with a Taq'ozyme kit (Ozyme) on total cDNA from *S. zeamais* (bacteriome extracts for *pgrp-lbi* and *pgrp-lbt*, challenged whole larvae for *pgrp-lbe*). Primers used are listed in **Table S3**. 1% agarose gel electrophoresis was then performed in order to visualize the amplified fragments.

### **PGRP-LBi production and purification**

PGRP-LBi was expressed, produced and purified in *E. coli* as previously described [2], and used for antibody production, biochemical assays, and bactericidal activity. The purified protein was concentrated and buffer-exchanged in Amicon Ultra 10K centrifugal filters from Merck Millipore:

- to buffer containing 0.05 M Tris-HCl (pH 8.8), 1 mM EDTA and 10% glycerol for antibody preparation.

- to buffer containing 0.02 M HEPES pH 7.4, 2 mM ZnSO<sub>4</sub>, 4 mM 2-mercaptoethanol and 10% glycerol for enzymatic activity assay and bactericidal activity assay.

### **DNA constructions for *pgrp-lb* expression in S2 *Drosophila* cells**

*pgrp-lbi* was amplified from *S. zeamais* cDNA by PCR using the primers *pgrp-lbi-S2-EcoRI-for* and *pgrp-lbi-S2-EcoRV-rev*, containing respectively EcoRI and EcoRV restriction sites. The PCR product was then inserted into the EcoRI and EcoRV sites of a pMT-V5-HisA plasmid (ThermoFisher Scientific) to produce pMT\_*pgrp-lbi*\_V5-His. This construct was used to produce a V5 C-terminally tagged PGRP-LBi (Construction (i), **Figure S3A**).

*pgrp-lbt* was amplified from *S. zeamais* cDNA by PCR using the primers *pgrp-lbt-S2-EcoRV-for* and *pgrp-lbt-S2-XhoI-rev*, containing respectively EcoRV and XhoI restriction sites. The PCR product was then inserted into the EcoRV and XhoI sites of a pMT-V5-HisA plasmid (ThermoFisher Scientific) to produce pMT\_*pgrp-lbt*\_V5-His. This construct was used to produce a C-terminally V5 tagged PGRP-LBt (Construction (ii), **Figure S3A**).

The *egfp* gene coding sequence was amplified from pEGFP-C1 (Clontech) by PCR using the primers *Fw\_EGFP\_KpnI* and *Rv\_EGFP\_EcoV* and the product was inserted into the KpnI and EcoRV site of plasmid pMT\_*pgrp-lbt*\_V5-His to produce pEGFP\_*pgrp-lbt*\_V5-His. This construct was used to produce an N-terminally EGFP and V5 C-terminally tagged PGRP-LBt (Construction (iii), **Figure S3A**).

All constructs were verified by DNA sequencing, and constructions were then used for ectopic expression in S2 *Drosophila* cells. All the primers used are listed in **Table S3**.

### ***pgrp-lb* expression in S2 *Drosophila* cells and immunostainings**

S2 cells were thawed and put in culture in Schneider medium (Invitrogen) containing fetal bovine serum (FBS, Fisher Scientific) 10% and penicillin-streptomycin 1% (Euromedex). 8-well Nunc® Lab-Tek® Chamber Slide™ systems (Sigma-Aldrich) were filled with 500 µL of S2 cells at 10<sup>6</sup> cells/mL. Cell transfection was performed by adding in each well: 100µL Schneider medium, 4 µL transfectin, 100 ng of construction (i), (ii) or (iii), and 350 µL Schneider medium containing FBS 10% and penicillin-streptomycin 1%. The day after, plasmid expression was induced by adding 2.5 µL of CuSO<sub>4</sub> 100mM in each well. Immunostainings were performed two days later. Cells were fixed with 500 µL PFA 4% during 10 min, washed repeatedly with PBS, permeabilized with PBS + triton 0.2% for 5 min. After washing with PBS, wells were blocked

with 500  $\mu$ L PBS + goat serum 5% (Sigma-Aldrich) for 1h, and rinsed with PBS. Wells were incubated with primary antibodies for 3 hours at room temperature (mouse anti-V5 antibody diluted 1:500, or rabbit anti-EGFP antibody diluted 1:200, Fisher Scientific). Wells were washed with PBS and incubated for 2 h at room temperature with secondary antibodies (Alexa Fluor® 647 goat anti-mouse IgG diluted 1:5000, ThermoFisher Scientific, or Rhodamine Red™-X goat anti-rabbit IgG, diluted 1:500, Molecular Probes). Wells were washed with PBS, water, and removed from the slide. Slides were dried, and mounted using PermaFluor™ Aqueous Mounting Medium (ThermoFisher Scientific), together with 4,6-diamidino-2-phenylindole (DAPI, Sigma-Aldrich) for nuclear staining (3  $\mu$ g/ml of medium). Slides were observed with a LSM800 confocal microscope (Zeiss) and images were taken with the Zen software.

### **DNA construction for *pgrp-lbt*-specific dsRNA synthesis**

The size of the portion encoding the transmembrane domain (hereafter referred to as ‘TM-domain’), specific to *pgrp-lbt*, is too small (115 bp) to generate a functional dsRNA in order to specifically inhibit *pgrp-lbt* transcripts. To overcome this problem, we generated a repetitive fragment of the cDNA coding for the TM-domain, long enough to trigger the RNAi machinery (194 bp), all the while preserving unique 5' and 3' extremities for PCR amplification with primers 5-*pgrp-lbt*-T7 and 3-*pgrp-lbt*-T7. The procedure is illustrated in **Figure S7C**.

First, TM-domain-fragment1 (**Figure S7C**) was amplified from *S. zeamais* total cDNA by PCR with 5\_TM-domain\_F1 and 3\_TM-domain\_F1\_ClaI primers. The fragment 1 (99 bp) was cloned into a pCR2.1-Topo expression vector (Invitrogen). Then, TM-domain-fragment2 (104 bp, **Figure S7C**) was amplified from *S. zeamais* total cDNA by PCR with 5\_TM-domain\_F2\_ClaI and 3\_TM-domain\_F2\_ClaI primers with ClaI SR at each extremities. Finally, pCR2.1-topo-TM-domain-fragment1 and PCR product TM-domain-fragment2 were digested by ClaI, ligated and transformed into an *E. coli* TOP10 strain. The final construction (pCR2.1-topo-TM-domain-fragment1-fragment2) was used as a template for dsRNA synthesis. All constructs were verified by DNA sequencing. All primers used are listed in **Table S3**.

### **DNA Extraction and qPCR Bacterial Count**

DNA extraction and symbiont density quantification was performed as previously described [6].

### ***S. pierantonius* localization by Fluorescence *in situ* Hybridization**

After methylcyclohexan dewaxing, deproteinization of slides was performed in hydrochlorid acid 0.01 N with pepsin 0.1 mg/mL for 10 min at 37 °C. The sections were then prehybridized, hybridized with a *S. pierantonius* specific 5'-end TAMRA-labeled oligo-probe targeting 16S RNA (TAMRA-ACC-CCC-CTC-TAC-GAG-AC-3', 10  $\mu$ g/mL), washed and then mounted in PermaFluor Mounting Fluid (ThermoFisher Scientific) containing 3  $\mu$ g/mL of 4',6-diamidino-2-phenylindole (DAPI), as previously described [7]. Images were acquired the same way as described in the “PGRP-LB immunostaining” part.

### **PGRP-LBi bactericidal assays**

*E. coli* (strain MG1655) was grown in LB medium to  $DO_{600}=0.6$ . In each well of a 96-well plate, 70  $\mu$ L of bacterial culture were added, as well as 10  $\mu$ L ethanolamine 0.5 M pH 9.6, 1.25  $\mu$ L of sterile water or  $ZnSO_4$  200 mM, and 20  $\mu$ L of HEPES 20 mM pH 7.4, 2-mercapto-ethanol 4 mM,

glycerol 10% containing PGRP-LBi at concentrations from 0 to 500 µg/mL. A well with sterile LB medium instead of bacteria was included to measure the background signal, and a well containing ampicillin was included as a positive control of a bactericidal activity. Each well was repeated twice in the same plate. The plate was incubated for 18 h at 30°C and DO<sub>600</sub> was then measured in each well with a PowerWave XS plate reader (BioTek).

### **Armadillo and Cut immunostainings**

Armadillo and Cut localization were performed with the same protocol as the PGRP-LB immunostainings. The anti-Armadillo antibody, developed by E. Wieschhaus, and the anti-Cut antibody, developed by G. M. Rubin, were obtained from the Developmental Studies Hybridoma Bank, created by the NICHD of the NIH and maintained at The University of Iowa, Department of Biology, Iowa City, IA 52242. The anti-Armadillo antibody was used at a 1:4 dilution, and the anti-Cut at a 1:10 dilution, as previously described [8]. An Alexa Fluor® 647 goat anti-mouse IgG diluted 1:500 (ThermoFisher Scientific) was used as the secondary antibody in both cases. Images were acquired the same way as described in the “PGRP-LB immunostaining” part.

### **Egg count in female ovaries**

Following dsRNA injection at day 1 after final ecdysis, female ovaries were dissected from day 4 to day 8, and at day 15 after ecdysis in diethylpyrocarbonate-treated Buffer A (25 mM KCl, 10 mM MgCl<sub>2</sub>, 250 mM Sucrose, 35 mM Tris/HCl, pH=7.5). Eggs were counted in five ovaries by condition.

### **Identification of genes of interest and accession numbers**

Genes encoding *colA*, *colB*, *sarcotoxin*, *imd*, and *relish* in *S. zeamais* were identified in previous studies [9–11]. *pgrp-lc* was first identified in a previously published *S. oryzae* transcriptome [12], based on the presence of a PG recognition domain, the absence of enzymatic activity, the presence of a RHIM domain and a transmembrane domain. A partial sequence was then recovered in *S. zeamais* based on sequence similarity with *S. oryzae*, and was subsequently amplified and sequenced (accession number: MH423625). *pgrp-lb* transcript sequences were identified from the transcriptomic data published in this study (accession number SRP149413), and were subsequently amplified and sequenced in *S. zeamais*. Accession number are as follows: *pgrp-lbi*: MH423627, *pgrp-lbt*: MH423628, *pgrp-lbe*: MH423629.

### **Statistical analysis**

Transcriptomic data on immune response kinetics (**Figure 2A**) were analyzed by fitting a Generalized Linear Model (GLM) with a Gamma transformation to the data. The type of PG injected was considered as a 3-level categorical variable representing the injection of sterile PBS (control), TCT, or polymeric DAP-type PG. The time post-infection was considered as a 4-level categorical variable. The impact of TCT or polymeric DAP-type PG was assessed by comparing with a t-test the regression coefficients specific to those factors, with those of PBS injection results. Other transcriptomic data were analyzed doing pairwise comparisons using a Welch t-test on the log-transformed gene expression data. Symbiont quantification data and egg load data were analyzed doing pairwise comparisons using a Student t-test.

All analyses and graphical figures were made using RStudio software v0.98.983 and Hmisc and nlme packages, as well as GraphPad Prism v7 for Windows. The effect of a factor was considered to be significant with a p-value <0.05. Graphical figures represent the mean of all replicates for each point. Error bars represent the standard error calculated as  $\sigma / \sqrt{n}$ , where  $\sigma$  is the standard deviation and n is the number of replicates.

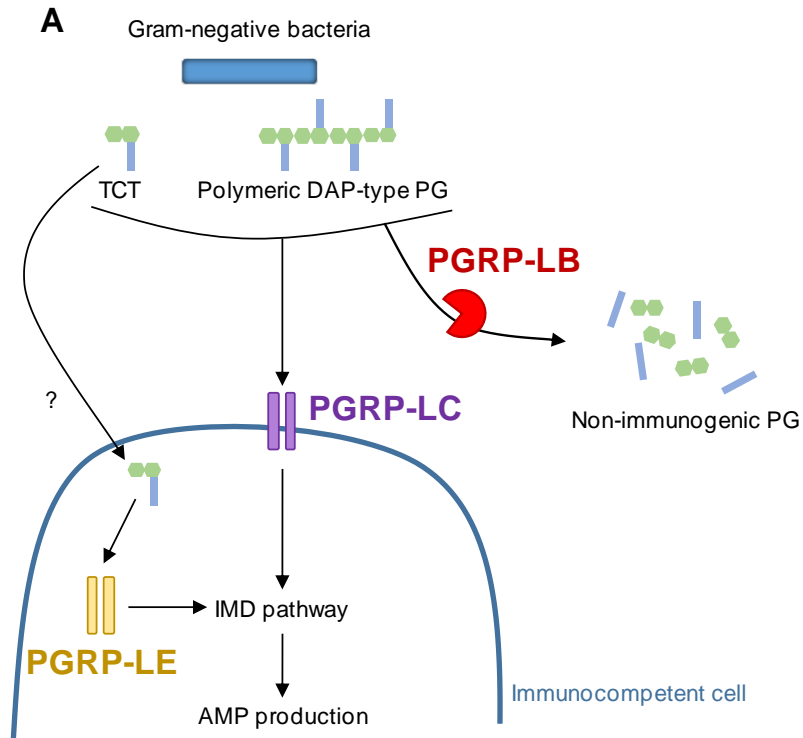

**B** Polymeric DAP-type PG

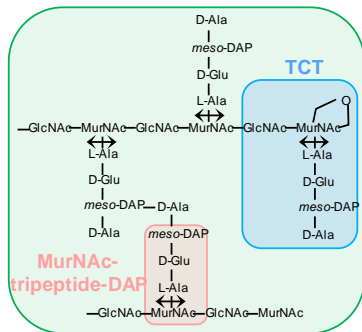

**C**

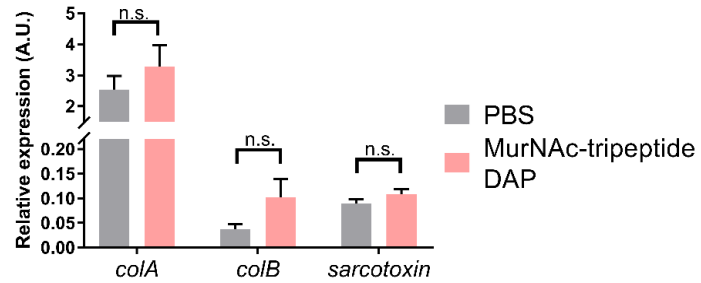

**D** Bacteriomes

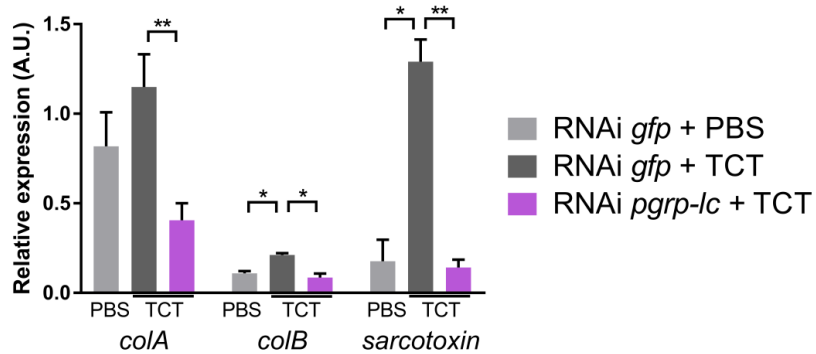



**Figure S1: Peptidoglycan recognition and structure. Related to Figure 2.** **A:** Schematic representation of PGRP-LC, -LE, and -LB function in the IMD pathway activation and regulation by bacterial PG in *Drosophila* [13]. DAP-type PG from Gram-negative bacteria can be monomeric (TCT) or polymeric (see panel B). The transmembrane receptor PGRP-LC recognizes both monomeric and polymeric circulating DAP-type PG. The intracellular isoform of the receptor PGRP-LE can only recognize TCT when located within insect cells. Both receptors lead to the IMD pathway activation, which upregulates AMP-encoding gene expression. PGRP-LB is an amidase that cleaves DAP-type PG into non-immunogenic fragments, therefore inhibiting the IMD pathway. **B:** Structure of DAP-type PG and monomeric fragments used in this study. Chains of DAP-type PG end with a 1,6-anhydro-MurNAc; when released, the terminal disaccharide-tetrapeptide motif corresponds to TCT (in green). Arrows indicate *N*-acetylmuramoyl-L-alanine amidase cleavage sites. **C:** Systemic AMP-encoding gene expression following MurNac-tripeptide-DAP injection. *colA*, *colB* and *sarcotoxin* expression were measured in carcasses by qRT-PCR six hours after either PBS or *E. coli* MurNAc-tripeptide-DAP injections. A.U.: Arbitrary Units. The mean and standard error for five independent replicates are represented. ‘n.s.’ indicates a non-significant difference between two conditions based on a Welch’s t-test. **D:** AMP-encoding gene expression in the bacteriome following *pgrp-lc* inhibition by RNAi. *colA*, *colB* and *sarcotoxin* expression was measured in bacteriomes by qRT-PCR 6 h after either PBS or TCT injection, six days following *gfp* or *pgrp-lc* dsRNA injection. Local AMP expression does not increase following TCT injection when *pgrp-lc* is inhibited. Asterisks indicate a significant difference between two conditions based on a Welch’s t-test. The mean and standard error for five independent replicates are represented. A.U. = Arbitrary Units. n.s.: non-significant; \*  $p < 0.05$ ; \*\* $p < 0.01$ ; \*\*\*  $p < 0.001$ .

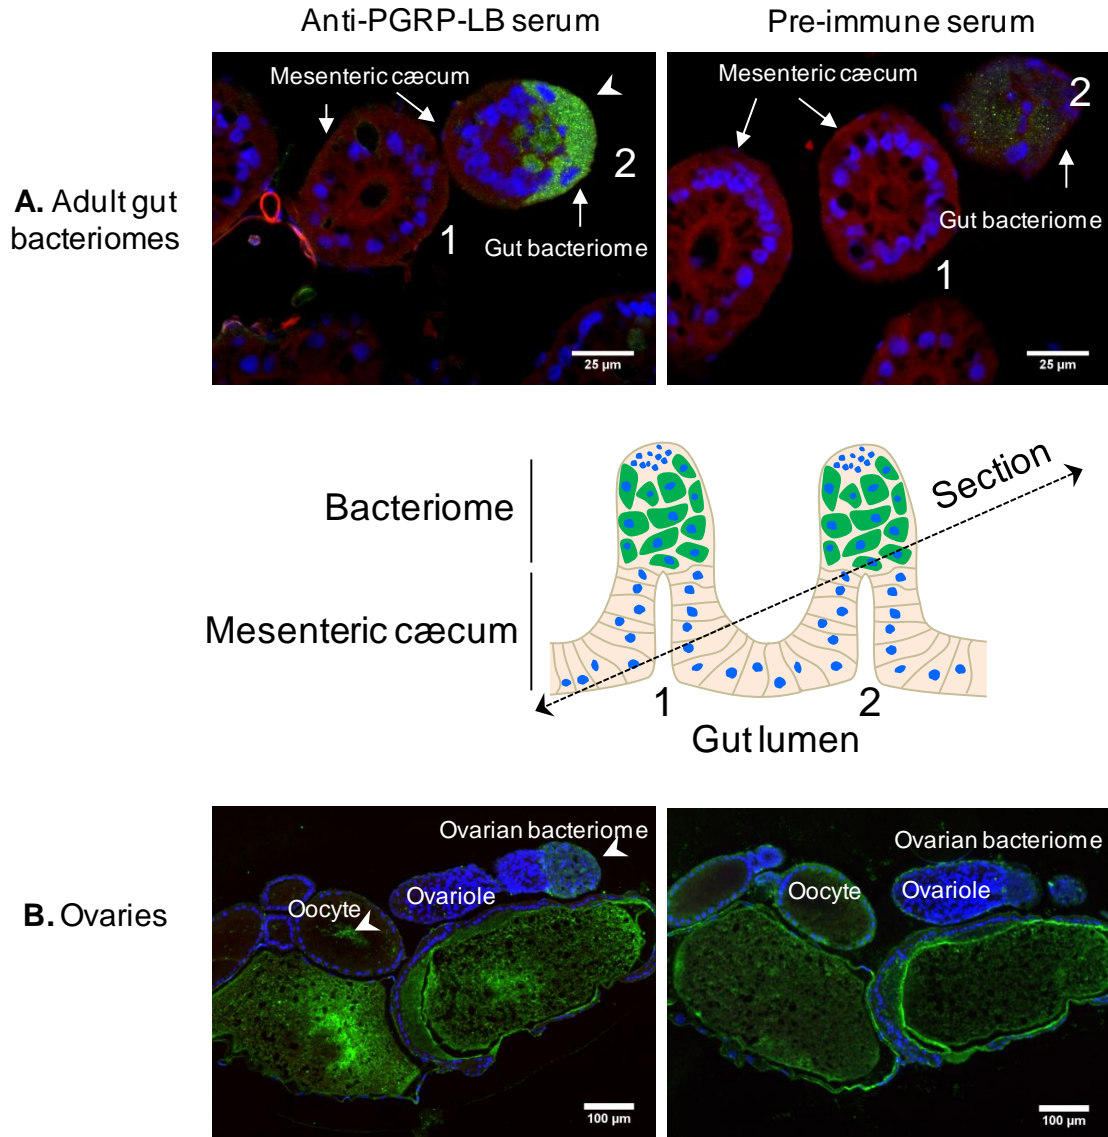

**Figure S2: PGRP-LB localization in other tissues by immunostaining. Related to Figure 3.** A pre-immune serum was used as the negative control (right column). PGRP-LB-associated signal (white arrowheads) is strongly observed in adult gut bacteriomes (**A**), oocytes and ovarian bacteriomes (**B**). Blue: DAPI; green: PGRP-LB; red: autofluorescence. A scheme showing the adult bacteriome morphology is included (bacteriocytes are in green), highlighting how the section was likely performed and the two caeca (1 and 2) observed in the fluorescence microscopy pictures.

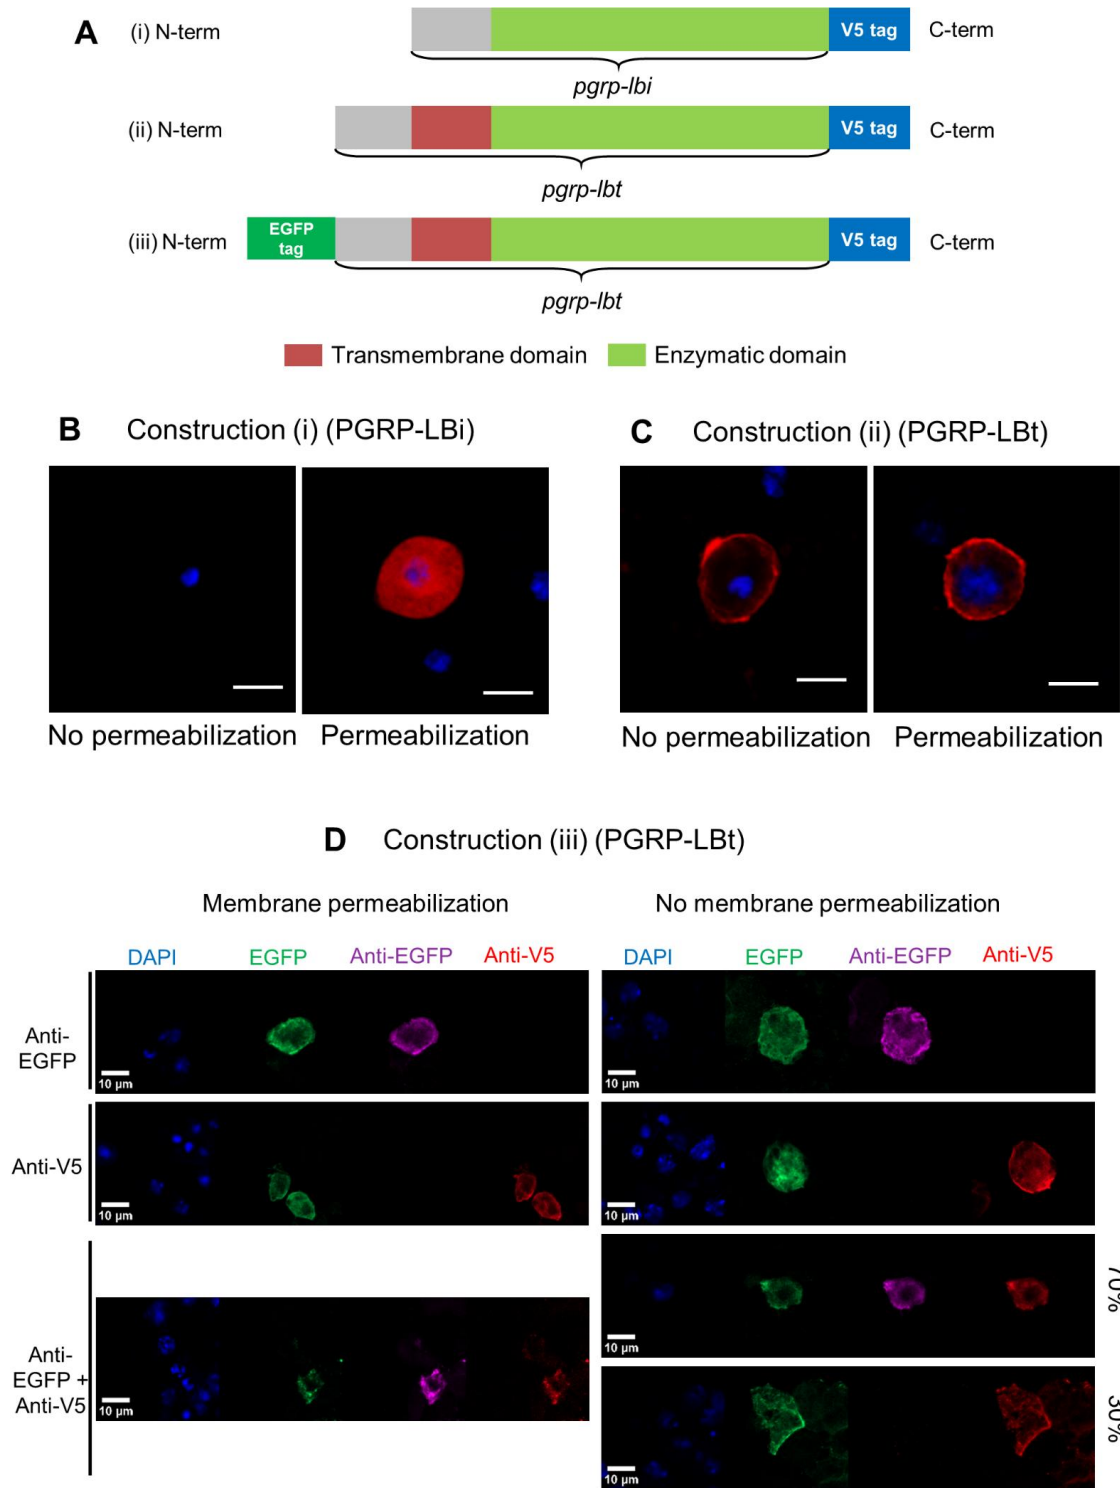

**Figure S3: Subcellular localization of PGRP-LBi and PGRP-LBt. Related to Figure 3. A:** Constructions (i), (ii), and (iii) were transfected and expressed in S2 *Drosophila* cells. **B-C:** Anti-V5 immunostaining, with (right column) or without (left column) membrane permeabilization and observed by confocal microscopy reveals that PGRP-LBi (B) is associated with intracellular signal while PGRP-LBt (C) is associated with transmembrane signal. Scale bar: 6µm. Blue:

DAPI; red: anti-V5 staining. **D:** Anti-V5 and/or anti-EGFP immunostainings, with (left column) or without (right column) membrane permeabilization, and observed by confocal microscopy reveal PGRP-LBt can adopt both orientations in *Drosophila* membranes. GFP signal was used as a transfection control. Immunostainings performed with (left column) or without (right column) cell permeabilisation all exhibited signal associated with antibodies that were used, *i.e.* magenta signal for anti-EGFP staining, red signal for anti-V5 staining, or both. The latter was only observed in 70% of the cells: the remaining 30% only exhibited anti-V5 signal. Blue: DAPI; green: EGFP; magenta: anti-EGFP staining; red: anti-V5 staining.

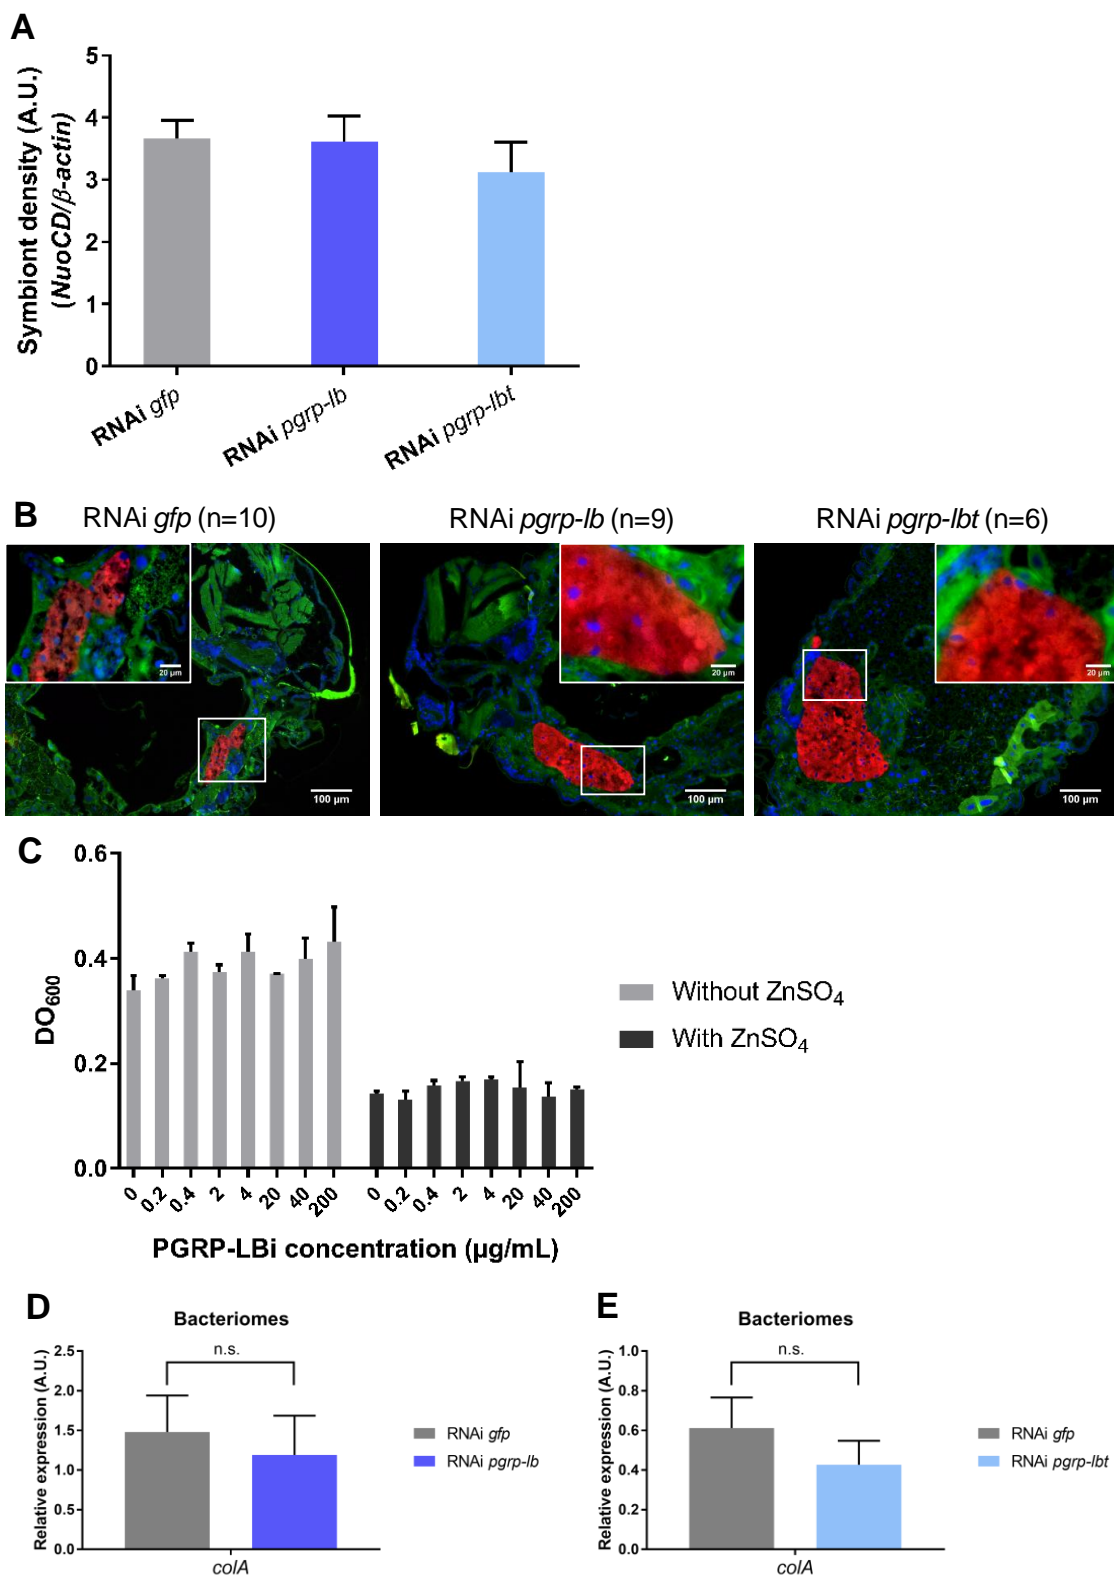

**Figure S4: *pgrp-lb* inhibition effect on symbiont control and localization. Related to Figure 7.** **A:** Global symbiont density in larvae eight days following *pgrp-lb* or *pgrp-lbt* RNAi treatment. Symbiont density was calculated as the ratio between the numbers of *NuoCD* genomic copies (*S. pierantonius* gene) and of  $\beta$ -*actin* genomic copies (*S. zeamais* gene). A.U.: Arbitrary Units. The mean and standard error for eight independent replicates are represented. No significant difference was found based on a Student t-test. **B:** *S. pierantonius* localization by FISH eight days after *pgrp-lb* or *pgrp-lbt* RNAi treatment. No morphological differences were observed and no endosymbiont outside of the bacteriome was seen. Blue: DAPI; green: autofluorescence; red: *S. pierantonius*. **C:** Bactericidal assay of recombinant PGRP-LBi. *E. coli* were incubated for 18 h with increasing concentrations of recombinant PGRP-LBi, with and without ZnSO<sub>4</sub> (a necessary compound for amidase activity). The presence of PGRP-LBi had no effect on bacterial growth. **D-E:** *colA* expression in the bacteriome eight days after *pgrp-lb* (D) or *pgrp-lbt* (E) RNAi treatment. *colA* expression was measured in dissected bacteriomes by qRT-PCR eight days after *pgrp-lb* or *pgrp-lbt* extinction. A.U.: Arbitrary Units. The mean and standard error for five independent replicates are represented. No significant difference (n.s.) was found between two conditions based on a Welch's t-test.

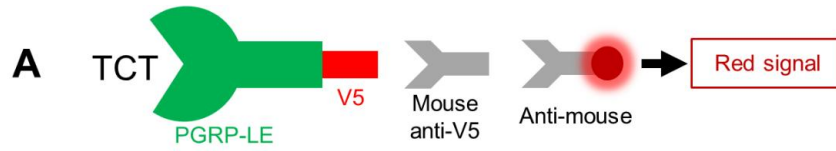

**B**

MGSHHHHHSGGKPIPNLLGLDSTGGELSAIIPRSSWLAQKPMDEPLPL  
 QLPVKYVVLHTATESSEKRAINVRLIRDMQCFHIESRGWNDIAYNFLVG  
 CDGNIYEGRGWKTVAHTLGYNRISLGISFIGCFMKELPTADALNMCRLN  
 LARGVEDGHISTDYRLICHQCNCSTESPGRRLYEEIQTPHPFYNIIEEEEQ

6His-tag with linkers : [1 : 11]  
 V5-tag : [12 : 25]  
 PGRP-LE[173-345] : [28 : 200]

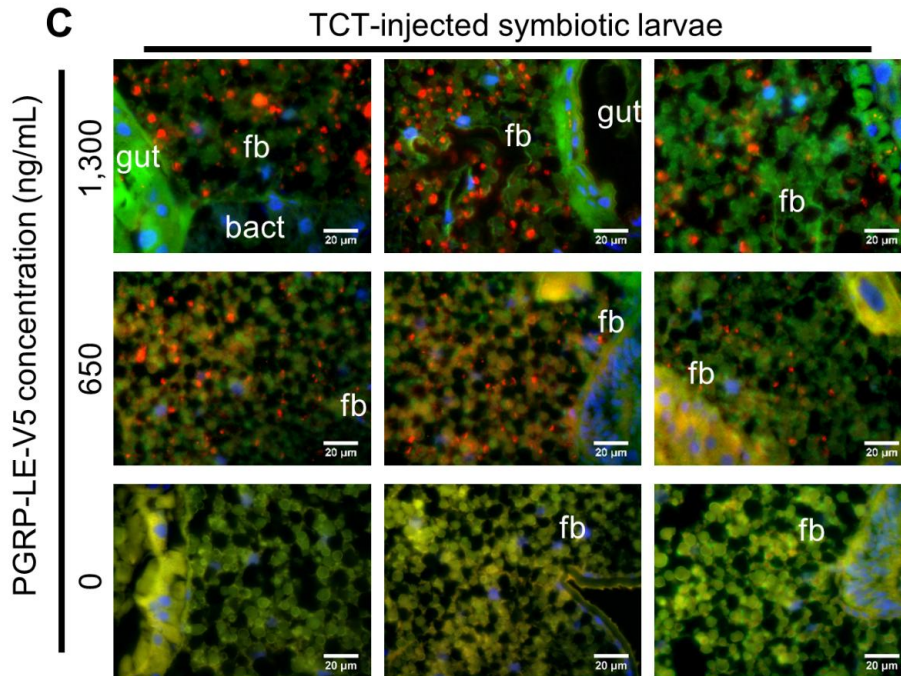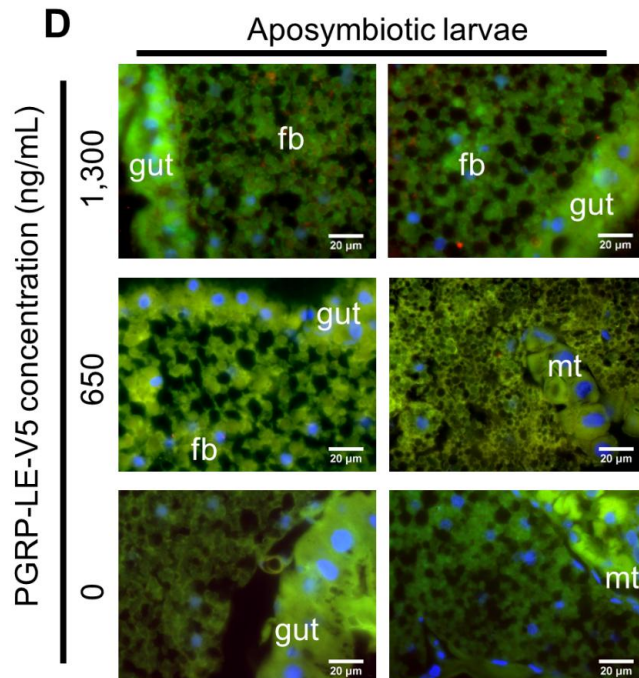

**Figure S5: Development and validation of a novel TCT localization tool. Related to Figure 7.** **A:** Schematic representation of the construction and protocol. *Drosophila* PGRP-LE recognition domain is used as a TCT detector, linked to a V5 tag. An anti-V5 immunostaining is then performed to reveal TCT presence. **B:** Protein sequence of the PGRP-LE-V5 construction. Blue: 6His-tag for protein purification. Red: V5-Tag. Green: *Drosophila* PGRP-LE recognition domain. **C:** TCT localization in TCT-injected symbiotic larvae. Larvae were recovered 1 h after the injection in the fat body of 55 nL of a 0.2 mM solution of purified TCT. Two dilutions of PGRP-LE-V5 were tested, as well as a negative control without PGRP-LE (lower panels). Red signal is observed throughout the fat body and is proportional to PGRP-LE-V5 concentration, confirming the efficiency of the method. **D:** TCT localization in naive aposymbiotic larvae, which do not possess any natural source of TCT. Two dilutions of PGRP-LE-V5 were tested in order to evaluate the background signal due to aspecific staining, as well as a negative control without PGRP-LE (lower panels). Faint signal is observed at the higher PGRP-LE-V5 concentration (upper panels), while no signal is observed at the lower dilution (middle panel). The second dilution (650 ng/mL) was thus chosen for any further experiment, since it allows TCT recognition in positive controls (Figure S5C). mt: Malpighian tubules; bact: bacteriome; fb: fat body. Blue: DAPI; green: autofluorescence; red: TCT.



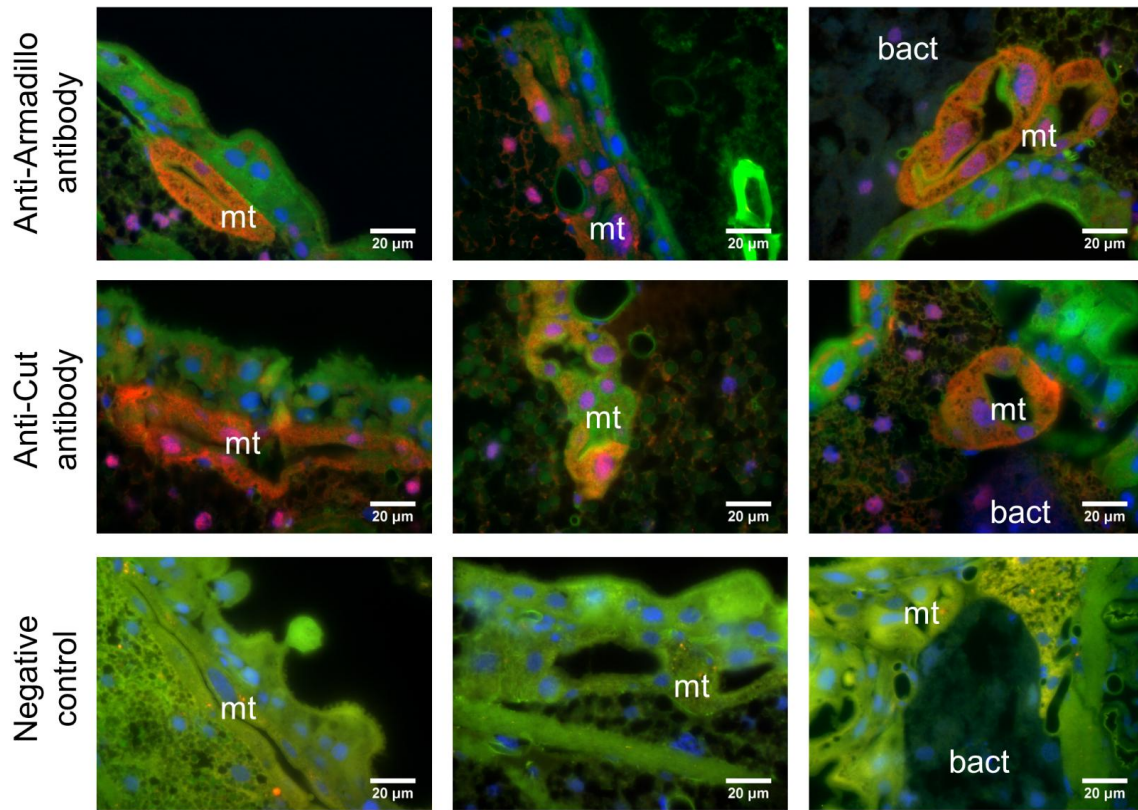

**Figure S6: Armadillo (upper panels) and Cut (middle panels) localization in larval tissues by immunostainings. Related to Figure 7.** A PBS negative control was included (lower panels). Both proteins are known to be strongly produced in the Malpighian tubules, supporting that the structures in which TCT was previously observed are indeed Malpighian tubules. Blue: DAPI; green: autofluorescence; red: Armadillo (upper panels) or Cut (middle panels).

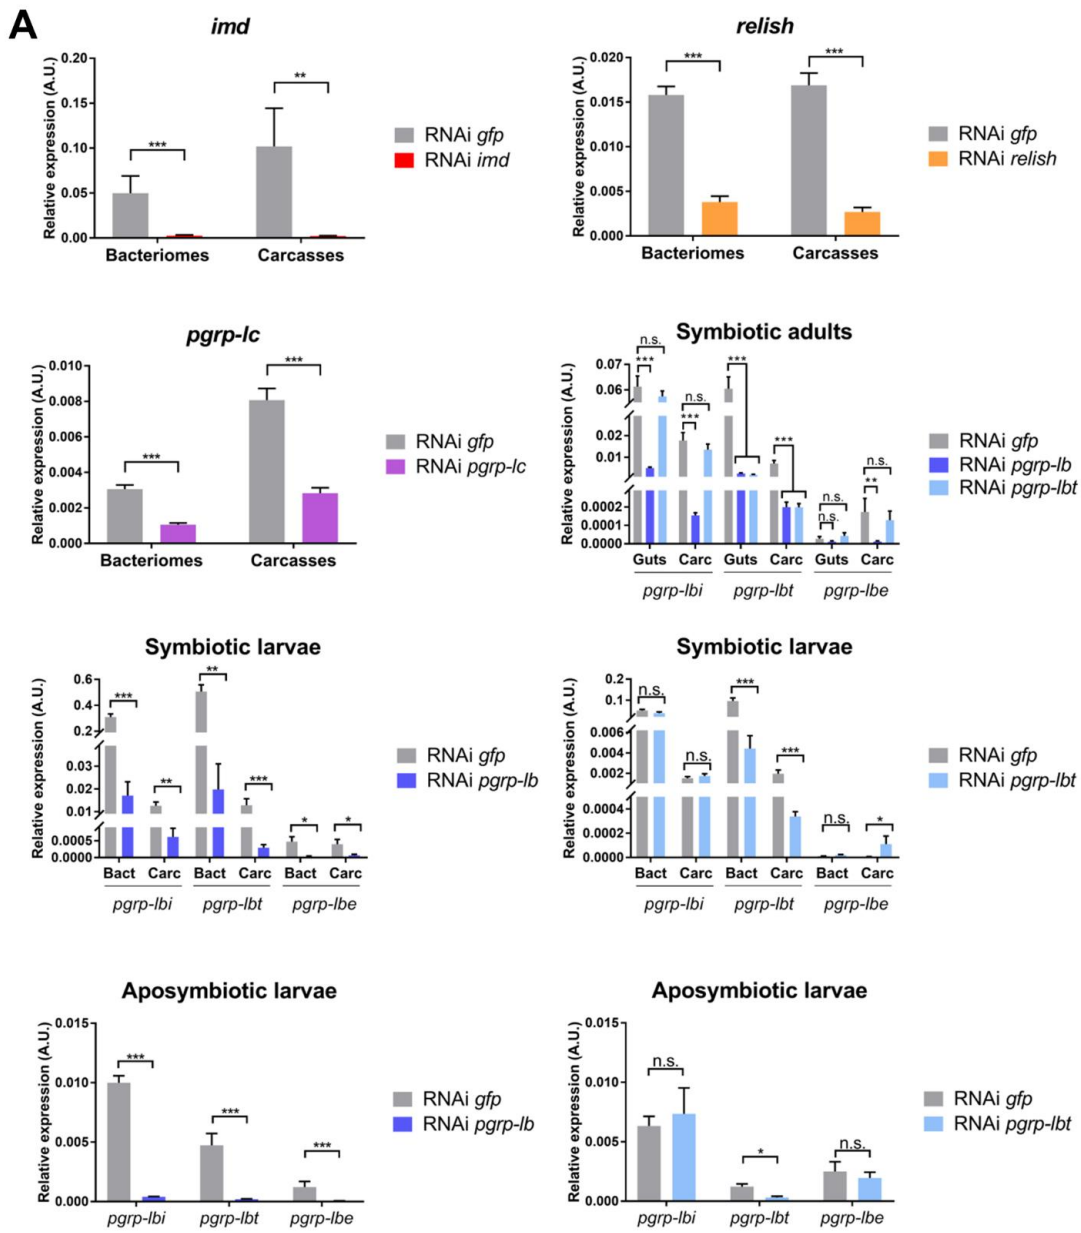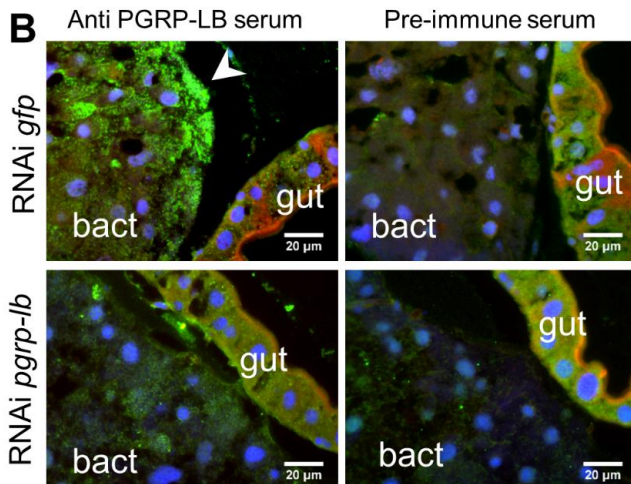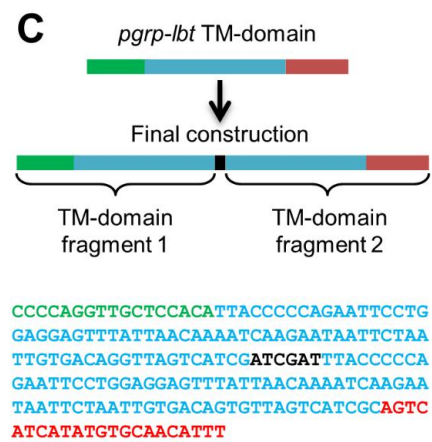

**Figure S7: Efficiency of RNAi treatments. Related to the Material and Methods. A:** Transcript quantification after its inhibition by RNAi was measured in bacteriomes, carcasses, or aposymbiotic larvae by qRT-PCR six (*imd*, *relish*, *pgrp-lc*, *pgrp-lb* and *pgrp-lbt* in adults) or eight days (*pgrp-lb* and *pgrp-lbt* in larvae) following dsRNA injection. Specificity of the *pgrp-lbt* inhibition was also checked by quantifying *pgrp-lbe* and *pgrp-lbi* transcript levels. A.U.: Arbitrary Units. The mean and standard error for five independent replicates are represented. Asterisks indicate a significant difference between two conditions based on a Welch's t-test (\*  $p < 0.05$ ; \*\*  $p < 0.01$ ; \*\*\*  $p < 0.001$ ). **B:** PGRP-LB localization in larval tissues by immunostaining eight days after *pgrp-lb* RNAi treatment. A pre-immune serum was used as the negative control (lower panels). PGRP-LB-associated signal is observed strongly in the bacteriome of RNAi *gfp* individuals (right upper panel), and is lost in RNAi *pgrp-lb* individuals (left upper panel). This confirms the efficiency of the RNAi at the protein level, as well as the specificity of the serum. Blue: DAPI; green: PGRP-LB; red: autofluorescence. Bact: bacteriome. **C:** DNA construction for *pgrp-lbt*-specific dsRNA synthesis. The upper panel is a schematic representation for the construction. The lower panel is the sequence of the DNA construction. TM-domain represents the transcript portion encoding the transmembrane domain, only specific sequence of the *pgrp-lbt* transcript. TM-domain was duplicated based on two different fragments, while preserving specific extremities for PCR amplification (in green and red).

**Table S1: Quantification of sugar and amino acid components in *S. pierantonius* PG after hydrolysis. Related to Figure 1. Components in red are typically found in DAP-type PG.**

|             | Replicate 1 (nmol) | Replicate 2 (nmol) |
|-------------|--------------------|--------------------|
| Asp         | 0.71               | 0.28               |
| Thr         | 0.26               | 0.09               |
| Ser         | 0.78               | 0.27               |
| <b>Mur</b>  | <b>0.2</b>         | <b>0.12</b>        |
| Glu         | 1.18               | 0.54               |
| Gly         | 1.21               | 0.39               |
| Ala         | 0.85               | 0.44               |
| Val         | 0.22               | 0.09               |
| <b>DAP</b>  | <b>0.26</b>        | <b>0.14</b>        |
| Ile         | 0.17               | 0.06               |
| Leu         | 0.45               | 0.14               |
| Tyr         | 0.11               | 0.01               |
| Phe         | 0.18               | 0.05               |
| <b>GlcN</b> | <b>0.4</b>         | <b>0.17</b>        |
| Lys         | 0.26               | 0.08               |
| His         | 0.1                | 0.08               |
| Arg         | 0.28               | 0.02               |

**Table S2: Numbers of TCT-positive individuals, either the Malpighian tubules or the gut, after *pgrp-lb* or *pgrp-lbt* inhibition. Related to Figure 7. n corresponds to the total of individuals that were observed for each condition.**

|                    | RNAi <i>gfp</i> (n = 7) | RNAi <i>pgrp-lb</i> (n = 15) | RNAi <i>pgrp-lbt</i> (n = 6) |
|--------------------|-------------------------|------------------------------|------------------------------|
| Malpighian tubules | 0                       | 7                            | 2                            |
| Gut                | 0                       | 3                            | 0                            |

**Table S3: List of primers used for PCR, qPCR, dsRNA synthesis and plasmid constructions.**

|      | <b>Primers</b>   | <b>Sequence (5'-3')</b>                      |
|------|------------------|----------------------------------------------|
| PCR  | 5-pgrp-lbi/t-pcr | TCCAGTAAGCAATCACGGTCCG                       |
|      | 3-pgrp-lbi/t-pcr | CTGTTTTATACTCCTCGACGT                        |
|      | 5-pgrp-lbe-pcr   | GTGTCTTGATTTGGGTAATATTC                      |
|      | 3-pgrp-lbe-pcr   | TTACTGTTTTATACTCCTCGACGT                     |
| qPCR | 5-relish         | CGTGGGCTTGAACAAAAAGGA                        |
|      | 3-relish         | GGTGTGGCCATGACCATCCA                         |
|      | 5-pgrp-lc        | AGCATCACCACCCAACATTC                         |
|      | 3-pgrp-lc        | TCACGGGTCCCATATATCCC                         |
|      | 5-imd            | ATCCGGTAACCGAAGACGATA                        |
|      | 3-imd            | ACAGTGGCTTTTTTAGTACCATTG                     |
|      | 5-coleoptericinA | GAATAGATAACAACGGGGGTCA                       |
|      | 3-coleoptericinA | CTACCATCTGACACTTCCTC                         |
|      | 5-coleoptericinB | CTGATGTTGGCCACTATCGC                         |
|      | 3-coleoptericinB | CCATGCTGGTTCACCTCCAC                         |
|      | 5-sarcotoxin     | AGTCACAAAGGAACAATTTTGG                       |
|      | 3-sarcotoxin     | AGAAGCCGTACGTCCGTTC                          |
|      | 5-mdh            | CCAAGAACAACAACAACCG                          |
|      | 3-mdh            | CTACACCAGGGAAGATGTAT                         |
|      | 5-rpl29          | TGGCCAAGTCCAAGAATCACA                        |
|      | 3-rpl29          | TTCTTGGCGCTAGCTTGTCTT                        |
|      | 5-gapdh          | AACTTTGCCGACAGCCTTGG                         |
|      | 3-gapdh          | GCGCCCATGTATGTAGTTGG                         |
|      | 5-NuoCD          | AATCGACGATCTTTCACCG                          |
|      | 3-NuoCD          | GAATTCGATCCCTTCGTCCT                         |
|      | 5-β-tubulin      | CAACTCCATCATGAAGTGCG                         |
|      | 3-β-tubulin      | CACATCTGTTGGAAGGTGGA                         |
|      | 5-pgrp-lbi       | AGAGAAAAGAGTTGAATTAATATAGTTGCGAACA           |
|      | 3-pgrp-lbi       | ATTGCATGTCATTTATACATTCCCTC                   |
|      | 5-pgrp-lbt       | TTACCCCAGGTTGCTCCAC                          |
|      | 3-pgrp-lbt       | ATTGCATGTCATTTATACATTCCCTC                   |
|      | 5-pgrp-lbe       | GTGTCTTGATTTGGGTAATATTC                      |
|      | 3-pgrp-lbe       | ATTGCATGTCATTTATACATTCCCTC                   |
| RNAi | 5-relish-T7      | TAATACGACTCACTATAGGGCCAACATGGCGGATCCCATA     |
|      | 3-relish-T7      | TAATACGACTCACTATAGGGCGGGTGACGCTTAAACCATC     |
|      | 5-pgrp-lc-T7     | TAATACGACTCACTATAGGGAGCGCCATACATCGAAAACG     |
|      | 3-pgrp-lc-T7     | TAATACGACTCACTATAGGGTCACCGCCACTATACTTCTCAC   |
|      | 5-imd-T7         | TAATACGACTCACTATAGGGACACAGGAACAGTTTTTCGTTCCG |
|      | 3-imd-T7         | TAATACGACTCACTATAGGGCGAATCCAATCCAGCAAGAACTG  |

|                |                       |                                            |
|----------------|-----------------------|--------------------------------------------|
|                | 5-pgrp-lb-T7          | TAATACGACTCACTATAGGGCCAGTCCCTTACGTCGTCAT   |
|                | 3-pgrp-lb-T7          | TAATACGACTCACTATAGGGTCTGTTTCTCGGACTTGCCT   |
|                | 5-pgrp-lbt-T7         | TAATACGACTCACTATAGGGCCCCAGGTTGCTCCACAT     |
|                | 3-pgrp-lbt-T7         | TAATACGACTCACTATAGGGAAATGTTGCACATATGATGACT |
|                | 5-gfp-T7              | TAATACGACTCACTATAGGGCAAGGAGGACGGCAACATCC   |
|                | 3-gfp-T7              | TAATACGACTCACTATAGGGATTTTATGTTTCAGGTTTCAG  |
| DNA constructs | 5_TM-domain_F1        | CCCCAGGTTGCTCCACAT                         |
|                | 3_TM-domain_F1_ClaI   | ATCGATGCGATGACTAACACTGCAC                  |
|                | 5_TM-domain_F2_ClaI   | CCGATCGATTACCCCCAGAATTCCTGGAG              |
|                | 3_TM-domain_F2_ClaI   | CCCATCGATAAATGTTGCACATATGATGACT            |
|                | pgrp-lbi-S2-EcoRI-for | CCGGAATTCATGTCCAGTAAGCAATCACGGTCGA         |
|                | pgrp-lbi-S2-EcoRV-rev | CCGGATATCCCTGTTTTATACTCCTCGACGTAC          |
|                | pgrp-lbt-S2-EcoRV-for | CCGGATATCATGTCCAGTAAGCAATCACGGTCG          |
|                | pgrp-lbt-S2-XhoI-rev  | CCGCTCGAGCTGTTTTATACTCCTCGACGTA            |
|                | Fw_EGFP_KpnI          | CGGGGACCTACTCCAGTATGGTGAGCAAGGGCGAGGA      |
|                | Rv_EGFP_EcoV          | CCGGAATGAATTCTTGACAGCTCGTCCATGC            |





INMGIRDGYISENYKLIGHRQVRETECPGEALYKEIQTWPHWIDNPSLDD  
 EVIPVVPLDKEDLKPDPREDSGASLASEDNKIKRHSSTHKEESTSRSIKQ

**>Szeamais\_PGRP-LBe TRINITY\_DN43557\_c0\_g1\_i3**

MCYNSCVLIWVIFTCHVANSFVCTDPEIVTRDEWGAKPPTGVENLTLFPV  
 YVVIHHSYI PAACSTKEECINDMQWMQNYHQQNSWCDIGYNFAVGGDNR  
 IYVGRGWTAVGAHAPRYNARSIGIVLIGDWTEILPPESQMLAAKQLINMG  
 IRDGYISENYKLIGHRQVRETECPGEALYKEIQTWPHWIDNPSLDDDEVIP  
 VVPLDKEDLKPDPREDSGASLASEDNKIKRHSSTHKEESTSRSIKQ

**Sitophilus oryzae PGRP-LB protein sequences**

|                   |                                                                                                         |     |
|-------------------|---------------------------------------------------------------------------------------------------------|-----|
| Soryzae_PGRP-LBi  | MSSKQSRSPVPTRECQFEKMEIEEQVKVKNLNI-----                                                                  | 31  |
| Soryzae_PGRP-LBt  | MSSKQSRSPVPTRECQFEKMEIEEQVKVKNLNIASQVASHYPQNSWRSLLTKSR <b>IIILIVTVI</b>                                 | 60  |
| Soryzae_PGRP-LBe1 | ----- <b>MCYNICV</b>                                                                                    | 7   |
| Soryzae_PGRP-LBe2 | ----- <b>MICY</b>                                                                                       | 4   |
| Soryzae_PGRP-LBe3 | ----- <b>MISY</b>                                                                                       | 4   |
|                   |                                                                                                         |     |
| Soryzae_PGRP-LBi  | -----VANSFVCTDPEIVTRDEWGAKPPTDVENLTLFPVYVVI <b>HH</b> SYIPAACTKE                                        | 82  |
| Soryzae_PGRP-LBt  | <b>VI</b> AV <b>II</b> CG <b>TF</b> AN <b>SF</b> VCTDPEIVTRDEWGAKPPTDVENLTLFPVYVVI <b>HH</b> SYIPAACTKE | 120 |
| Soryzae_PGRP-LBe1 | <b>LI</b> W <b>V</b> IL <b>T</b> CH <b>V</b> ANSFVCTDPEIVTRDEWGAKPPTDVENLTLFPVYVVI <b>HH</b> SYIPAACTKE | 67  |
| Soryzae_PGRP-LBe2 | <b>SL</b> V <b>S</b> LY <b>L</b> FR <b>V</b> ANSFVCTDPEIVTRDEWGAKPPTDVENLTLFPVYVVI <b>HH</b> SYIPAACTKE | 64  |
| Soryzae_PGRP-LBe3 | <b>IL</b> V <b>IL</b> CY <b>FT</b> VANSFVCTDPEIVTRDEWGAKPPTDVENLTLFPVYVVI <b>HH</b> SYIPAACTKE          | 64  |
|                   | .*****                                                                                                  |     |
|                   |                                                                                                         |     |
| Soryzae_PGRP-LBi  | ECINDMQWMQKYHQQNSWCDIGYNFAVGGDNR IYVGRGWTAVGAHAPRYNSRSIGIVLI                                            | 142 |
| Soryzae_PGRP-LBt  | ECINDMQWMQKYHQQNSWCDIGYNFAVGGDNR IYVGRGWTAVGAHAPRYNSRSIGIVLI                                            | 180 |
| Soryzae_PGRP-LBe1 | ECINDMQWMQKYHQQNSWCDIGYNFAVGGDNR IYVGRGWTAVGAHAPRYNSRSIGIVLI                                            | 127 |
| Soryzae_PGRP-LBe2 | ECINDMQWMQKYHQQNSWCDIGYNFAVGGDNR IYVGRGWTAVGAHAPRYNSRSIGIVLI                                            | 124 |
| Soryzae_PGRP-LBe3 | ECINDMQWMQKYHQQNSWCDIGYNFAVGGDNR IYVGRGWTAVGAHAPRYNSRSIGIVLI                                            | 124 |
|                   | *****                                                                                                   |     |
|                   |                                                                                                         |     |
| Soryzae_PGRP-LBi  | GDWTDILPPESQMLAAKQLINMGIRDGYISENYKLIGHRQVRE <b>TA</b> CPGEALYKEIQMWPH                                   | 202 |
| Soryzae_PGRP-LBt  | GDWTDILPPESQMLAAKQLINMGIRDGYISENYKLIGHRQVRE <b>TAC</b> PGEALYKEIQMWPH                                   | 240 |
| Soryzae_PGRP-LBe1 | GDWTDILPPESQMLAAKQLINMGIRDGYISENYKLIGHRQVRE <b>TAC</b> PGEALYKEIQMWPH                                   | 187 |
| Soryzae_PGRP-LBe2 | GDWTDILPPESQMLAAKQLINMGIRDGYISENYKLIGHRQVRE <b>TAC</b> PGEALYKEIQMWPH                                   | 184 |
| Soryzae_PGRP-LBe3 | GDWTDILPPESQMLAAKQLINMGIRDGYISENYKLIGHRQVRE <b>TA</b> CPGEALYKEIQMWPH                                   | 184 |
|                   | *****                                                                                                   |     |
|                   |                                                                                                         |     |
| Soryzae_PGRP-LBi  | WIPNPDEEVI PVVPLDKEDLKPDPREDPDASLASEDNEIKRHSSTDKDESTSRSIKHT                                             | 260 |
| Soryzae_PGRP-LBt  | WIPNPDEEVI PVVPLDKEDLKPDPREDPDASLASEDNEIKRHSSTDKDESTSRSIKHT                                             | 298 |
| Soryzae_PGRP-LBe1 | WIPNPDEEVI PVVPLDKEDLKPDPREDPDASLASEDNEIKRHSSTDKDESTSRSIKHT                                             | 245 |
| Soryzae_PGRP-LBe2 | WIPNPDEEVI PVVPLDKEDLKPDPREDPDASLASEDNEIKRHSSTDKDESTSRSIKHT                                             | 242 |
| Soryzae_PGRP-LBe3 | WIPNPDEEVI PVVPLDKEDLKPDPREDPDASLASEDNEIKRHSSTDKDESTSRSIKHT                                             | 242 |
|                   | *****                                                                                                   |     |

**>Soryzae\_PGRP-LBi TRINITY\_DN16375\_c4\_g1\_i2**

MSSKQSRSPVPTRECQFEKMEIEEQVKVKNLIVANSFVCTDPEIVTRDEWG  
 AKPPTDVENLTLFPVYVVIHHSYI PAACSTKEECINDMQWMQKYHQQNS  
 WCDIGYNFAVGGDNR IYVGRGWTAVGAHAPRYNSRSIGIVLIGDWTDILP  
 PESQMLAAKQLINMGIRDGYISENYKLIGHRQVRETAC PGEALYKEIQMW  
 PHWI PNPDEEVI PVVPLDKEDLKPDPREDPDASLASEDNEIKRHSSTDKD  
 ESTSRSIKHT

**>Soryzae\_PGRP-LBt TRINITY\_DN16375\_c4\_g1\_i4**

MSSKQSRSPVPTRECQFEKMEIEEQVKVKNLIASQVASHYPQNSWRSLLTK

SRIILIVTVLVI AVI ICGTFANSFVCTDPEIVTRDEWGAKPPTDVENLTL  
 PVPYVVIHHSYI PAACSTKEECINDMQWMQKYHQNNNSWCDIGYNFAVGG  
 DNRIYVGRGWTAVGAHAPRYNSRSIGIVLIGDWT DILPPESQMLAAKQLI  
 NMGIRDGYISENYKLIGHRQVRETACPGEALYKEIQMWPHWI PNPDEEVI  
 PVPVPLDKEDLKPDPREDPDASLASEDNEIKRHSSTDKDESTSRSIKHT

**>Soryzae\_PGRP-LBe1 TRINITY\_DN16375\_c4\_g1\_i1**

MCYNICVLIWVILTCHVANSFVCTDPEIVTRDEWGAKPPTDVENLTL PVP  
 YVVIHHSYI PAACSTKEECINDMQWMQKYHQNNNSWCDIGYNFAVGGDNRIYV  
 GRGWTAVGAHAPRYNSRSIGIVLIGDWT DILPPESQMLAAKQLINMG  
 IRDGYISENYKLIGHRQVRETACPGEALYKEIQMWPHWI PNPDEEVI PVP  
 PLDKEDLKPDPREDPDASLASEDNEIKRHSSTDKDESTSRSIKHT

**>Soryzae\_PGRP-LBe2 TRINITY\_DN16375\_c4\_g1\_i3**

MICYSLVSLYLFRVANSFVCTDPEIVTRDEWGAKPPTDVENLTL PVPYV  
 IHHSYI PAACSTKEECINDMQWMQKYHQNNNSWCDIGYNFAVGGDNRIYV  
 GRGWTAVGAHAPRYNSRSIGIVLIGDWT DILPPESQMLAAKQLINMGIRD  
 GYISENYKLIGHRQVRETACPGEALYKEIQMWPHWI PNPDEEVI PVPVPLD  
 KEDLKPDPREDPDASLASEDNEIKRHSSTDKDESTSRSIKHT

**>Soryzae\_PGRP-LBe3 TRINITY\_DN16375\_c4\_g1\_i5**

MISYILVILCYFTVANSFVCTDPEIVTRDEWGAKPPTDVENLTL PVPYV  
 IHHSYI PAACSTKEECINDMQWMQKYHQNNNSWCDIGYNFAVGGDNRIYV  
 GRGWTAVGAHAPRYNSRSIGIVLIGDWT DILPPESQMLAAKQLINMGIRD  
 GYISENYKLIGHRQVRETACPGEALYKEIQMWPHWI PNPDEEVI PVPVPLD  
 KEDLKPDPREDPDASLASEDNEIKRHSSTDKDESTSRSIKHT

**Sitophilus linearis PGRP-LB protein sequences**

|                     |                                                              |     |
|---------------------|--------------------------------------------------------------|-----|
| Slinearis_PGRP-LBe1 | MCLCVTLCAVISVILICDVVNSFVYDPPEIVTREEWCAKPPTSVEKLTLPVPYVVIHHSY | 60  |
| Slinearis_PGRP-LBe2 | -----MINYIFAFLCYFNVVNSFVYDPPEIVTREEWCAKPPTSVEKLTLPVPYVVIHHSY | 55  |
|                     | : :*: : :*****                                               |     |
| Slinearis_PGRP-LBe1 | IPAACYNKEECINAMQWMQKFHQNNRSWCDIGYNFAVGGDNRIYVGRGWTAVGAHAPLYN | 120 |
| Slinearis_PGRP-LBe2 | IPAACYNKEECINAMQWMQKFHQNNRSWCDIGYNFAVGGDNRIYVGRGWTAVGAHAPLYN | 115 |
|                     | *****                                                        |     |
| Slinearis_PGRP-LBe1 | TKSMGIVLIGNWEDILPPESQMLVAKQLINMGIRGGYISKNYKLIGHRQVRETVCPGQAL | 180 |
| Slinearis_PGRP-LBe2 | TKSMGIVLIGNWEDILPPESQMLVAKQLINMGIRGGYISKNYKLIGHRQVRETVCPGQAL | 175 |
|                     | *****                                                        |     |
| Slinearis_PGRP-LBe1 | YEEIQTWPHFTENPTLEIRRDPVSLDKEHVKPDPREEFDARLSFENNQVRRRSSINKE   | 239 |
| Slinearis_PGRP-LBe2 | YEEIQTWPHFTENPTLEIRRDPVSLDKEHVKPDPREEFDARLSFENNQVRRRSSINKE   | 234 |
|                     | *****                                                        |     |

**>Slinearis\_PGRP-LBe1 TRINITY\_DN65546\_c3\_g3\_i7**

MCLCVTLCAVISVILICDVVNSFVYDPPEIVTREEWCAKPPTSVEKLTLP  
 VPYVVIHHSYI PAACYNKEECINAMQWMQKFHQNNRSWCDIGYNFAVGG  
 NRIYVGRGWTAVGAHAPLYN TKSMGIVLIGNWEDILPPESQMLVAKQLIN  
 MGIRGGYISKNYKLIGHRQVRETVCPGQALYEEIQTWPHFTENPTLEIRR  
 DVPVSLDKEHVKPDPREEFDARLSFENNQVRRRSSINKE

**>Slinearis\_PGRP-LBe2 TRINITY\_DN65546\_c3\_g3\_i5**

MINYIFAVLCYFNVVNSFVYPDPEIVTREEWCAKPPTSVEKLTLPVPYV  
IHHSYIPAACYNKEECINAMQWMQKFHQQNRSWCDIGYNFAVGGDNRIYV  
GRGWTAVGAHAPLYNTKSMGIVLIGNWEDILPPESQMLVAKQLINMGIRG  
GYISKNYKLIGHRQVRETVC PGQALYEEIQTPHFTENPTLEIRRDPVS  
LDKEHVKPDPREEDARLSFENNQVRRRSSINKE

---

**Sitophilus zeamais PGRP-LB transcript sequences**

---

**>Szeamais\_PGRP-LBi TRINITY\_DN43557\_c0\_g1\_i2 len=1098**

TGTCCCAGCAACAACAAGTCTGTAATGTCCAGTAAGCAATCACGGTCGATAGTACCCACG  
TGCGAGTGTAAGTTCGAAAAAATGGAAGAAATGGAGAGAAAAAAGTTGAATTAAATATA  
GTTGCGAACAGCTTCGTATGTACAGACCCGGAAATAGTTACGAGGGACGAATGGGGTGCC  
AAACCACCCACGGGCGTGAAAACCTTAACTCTACCAGTCCCTTACGTCGTCATACACCAC  
AGTTATATACCTGCAGCTTGTTCAACAAAAGAGGAATGTATAAATGACATGCAATGGATG  
CAAACCTATCATCAACAAAATAATTTCATGGTGCGATATTGGATATAATTTTCGCTGTTGGA  
GGGACAACAGAATTTACGTTGGACGAGGTTGGACAGCTGTAGGAGCCCACGCTCCCCGT  
TACAATGCCAGAAGCATTGGAATCGTCCTGATAGGAGATTGGACAGAAATATTACCTCCA  
GAGAGTCAAATGTTAGCAGCAAAACAATTGATTAATATGGGAATCAGAGACGGCTATATA  
AGTGAAAACCTACAAATTAATTGGTCATAGGCAAGTCCGAGAAACAGAATGTCCAGGAGAA  
GCATTATATAAAGAGATCCAAACGTGGCCTCACTGGATAGACAACCCCAGCCTCGACGAC  
GAGGTCATTCCTGTAGTACCTCTAGACAAAGAAGACCTTAAACCAGATCCCAGAGAGGAT  
TCTGGTGCTAGCTTGGCATCTGAAGATAATAAAATTAACGACATAGTTCTACACACAAA  
GAGGAAAGTACGTCGAGGAGTATAAAACAGTAATACATAAAAACTATCTTTTCACTCTAAT  
TGTGTTAAAAAATGATGTTCCCTTATTAAGCTAATATAGACAATTAAAAACCTTTCTTTCAATC  
AAACATTGAGGTTCACTGGACGAGAAAATTCACCGTGTGTTTGTGCAAATATGCTCTGAA  
AAAACCTAGAGATAGATTTTCGTTATATGTATATGAAACCATCAAATAAAGTGATTAACGA  
TGTTTATACAACGTTCCCTATTTTAAAGTATTTTTTTTAAATATCTTTGTAACCTATTACAG  
TCTTTCATTAATAAAGTT

**>Szeamais\_PGRP-LBt TRINITY\_DN43557\_c0\_g1\_i5 len=1212**

TGTCCCAGCAACAACAAGTCTGTAATGTCCAGTAAGCAATCACGGTCGATAGTACCCACG  
TGCGAGTGTAAGTTCGAAAAAATGGAAGAAATGGAGAGAAAAAAGTTGAATTAAATATA  
GTACCCAGGTTGCTCCACATTACCCCCAGAATTCCTGGAGGAGTTTATTAACAAAATCA  
AGAATAATTCTAATTGTGACAGTGTTAGTCATCGCAGTCATCATATGTGCAACATTTGCG  
AACAGCTTCGTATGTACAGACCCGGAAATAGTTACGAGGGACGAATGGGGTGCCAAACCA  
CCCACGGGCGTGAAAACCTTAACTCTACCAGTCCCTTACGTCGTCATACACCACAGTTAT  
ATACCTGCAGCTTGTTCAACAAAAGAGGAATGTATAAATGACATGCAATGGATGCAAAAC  
TATCATCAACAAAATAATTTCATGGTGCGATATTGGATATAATTTTCGCTGTTGGAGGGGAC  
AACAGAATTTACGTTGGACGAGGTTGGACAGCTGTAGGAGCCCACGCTCCCCGTTACAAT  
GCCAGAAGCATTGGAATCGTCCTGATAGGAGATTGGACAGAAATATTACCTCCAGAGAGT  
CAAATGTTAGCAGCAAAACAATTGATTAATATGGGAATCAGAGACGGCTATATAAGTGAA  
AACTACAAATTAATTGGTCATAGGCAAGTCCGAGAAACAGAATGTCCAGGAGAAGCATTA  
TATAAAGAGATCCAAACGTGGCCTCACTGGATAGACAACCCCAGCCTCGACGACGAGGTC  
ATTCTGTAGTACCTCTAGACAAAGAAGACCTTAAACCAGATCCCAGAGAGGATTCTGGT  
GCTAGCTTGGCATCTGAAGATAATAAAATTAACGACATAGTTCTACACACAAAGAGGAA

AGTACGTCGAGGAGTATAAAACAGTAATACATAAAAACTATCTTTCACTCTAATTGTGTT  
AAAAAATGATGTTCCCTTATTAAGCTAATATAGACAATTAAAACTTCTTTCAATCAAACAT  
TGAGGTTCACTGGACGAGAAAATTC AACCGTGT TTTTGTGCAAATATGCTCTGAAAAAACC  
TAGAGATAGATTTTCGTTATATGTATATGAAACCATCAAATAAAGTGATTAACGATGTTTA  
TACAACGTTCCATTTTTAAAGTATTTTTTTTTAAATATCTTTGTAAC TATTACAGTCTTTC  
ATTAATAAAGTT

**>Szeamais\_PGRP-LBe TRINITY\_DN43557\_c0\_g1\_i3 len=1272**

TTCCAGCATACCCCGCGCAGATATGCTATATAATATAATAGTCAAGGACCAAGCATTTCGG  
AGGCCAAAATTTGAAAGTATTAACAGCATT CATATCAAATGTAGACAGAAGCAACAGGGA  
ATTTAAAGATATTTTTTTAAGGATGTAAAAATTGTTAAAAATTAGTTCCCTTCTACAAAAGC  
CTGTGAAACTAACTGAAAGTGATATACTGTGATATTTAGTGGAGTTTAGTTACTATTATT  
TTTAAGATGTGTTATAATAGTTGTGTCTTGATTTGGGTAATATTCACATGTCATGTTGCG  
AACAGCTTCGTATGTACAGACCCGAAATAGTTACGAGGGACGAATGGGGTGCCAAACCA  
CCCACGGGCGTGAAACTTAACTCTACCAGTCCCTTACGTCGTCATACACCACAGTTAT  
ATACCTGCAGCTTGTTC AACAAAAGAGGAATGTATAAATGACATGCAATGGATGCAAAAC  
TATCATCAACAAAATAATTCATGGTGCGATATTGGATATAATTTTCGCTGTTGGAGGGGAC  
AACAGAATTTACGTTGGACGAGGTTGGACAGCTGTAGGAGCCCACGCTCCCCGTTACAAT  
GCCAGAAGCATTGGAATCGTCCTGATAGGAGATTGGACAGAAATATTACCTCCAGAGAGT  
CAAATGTTAGCAGCAAAACAATTGATTAATATGGGAATCAGAGACGGCTATATAAGTGAA  
AACTACAAATTAATTGGTCATAGGCAAGTCCGAGAAACAGAATGTCCAGGAGAAGCATTA  
TATAAAGAGATCCAAACGTGGCCTCACTGGATAGACAACCCAGCCTCGACGACGAGGTC  
ATTCCTGTAGTACCTCTAGACAAAGAAGACCTTAAACCAGATCCCAGAGAGGATTCTGGT  
GCTAGCTTGGCATCTGAAGATAATAAAATTAAACGACATAGTTCTACACACAAAGAGGAA  
AGTACGTCGAGGAGTATAAAACAGTAATACATAAAAACTATCTTTCACTCTAATTGTGTT  
AAAAAATGATGTTCCCTTATTAAGCTAATATAGACAATTAAAACTTCTTTCAATCAAACAT  
TGAGGTTCACTGGACGAGAAAATTC AACCGTGT TTTTGTGCAAATATGCTCTGAAAAAACC  
TAGAGATAGATTTTCGTTATATGTATATGAAACCATCAAATAAAGTGATTAACGATGTTTA  
TACAACGTTCCATTTTTAAAGTATTTTTTTTTAAATATCTTTGTAAC TATTACAGTCTTTC  
ATTAATAAAGTT

---

**Sitophilus oryzae PGRP-LB transcript sequences**

---

**>Soryzae\_PGRP-LBi TRINITY\_DN16375\_c4\_g1\_i2 len=1263**

CGCATCCCCTAAGAACATAGGACATTTCGTTTACAGTGCAGCGAAAAGTATCATTAGTCT  
TATAAGTACCACAATTATTTTATCTTGTATTGATACAGTCGATAAATCTTAGACCGAT  
TTAAATATTTAGGGATTTACTTAACTTCGGGCTTCAGTGTAGTGTAAATAAGTCTGTAAA  
AAAGGTATGTCCAGTAAGCAGTCACGGTCGGTACCCACGCGAGTGTGAGTTGAAAAA  
ATGGAAGAAATTGAAGAGCAAAAAGTCAAATAAATATAGTTGCGAACAGCTTCGTATGT  
ACAGACCCCGAAAATAGTTACGAGGGACGAATGGGGTGCCAAACCACCCACAGATGTTGAA  
AACTTAACTCTACCAGTTCCTTACGTCGTCATACACCACAGTTATATACCTGCAGCTTGT  
TCAACAAAAGAGGAATGTATAAATGACATGCAATGGATGCAAAAAGTATCATCAACAAAAT  
AATTCATGGTGCATATTGGATATAATTTTCGCTGTTGGAGGGGACAATAGAATTTACGTT  
GGACGAGGTTGGACAGCTGTAGGGGCCACGCTCCCCGTTACAATTCCAGAAGCATTGGA  
ATAGTCCTGATAGGAGATTGGACAGATATATTACCCCGAGAGTCAAATGTTAGCAGCA  
AAACAACCTGATTAATATGGGAATCAGAGACGGCTATATAAGTGAAAACACTCAAATTAAT  
GGGCATAGGCAAGTCCGAGAGACAGCATGTCCAGGAGAAGCATTATATAAGGAGATCCAA  
ATGTGGCCTCACTGGATCCCCAACCCGATGAAGAGGTCATTCCTGTAGTACCTCTAGAC  
AAAGAAGACCTTAAACCAGATCCAGAGAAGATCCGGATGCCAGCTTGGCATCTGAAGAT  
AATGAAATTAACGACATAGTTCTACAGACAAGGATGAAAGTACGTCGAGGAGTATAAAA  
CATAATAAAAACCTATCTTCCACTCTAATTGTGTTTAAAAATTATGTTCTTATTAAGCT  
AATAGATCATTAAAACCTTTTTTTTATCAAACATTTGAGGTTCACTGGACGAGAAAATTCCA  
ACGTGTTGTGTGCAAATATGCTCTCAAAAAACCTACAGATAGATTTTCGTTATACTCGTA  
TGTATCTGAATCCATCAAATAAAGTGATTAACGATATTTATACGACGTTCTATTTTAAA  
GTATTTTTTAAATCTCTTTGTAACCTATTACTGTCTTTCATTAATAAAGTTCATATCAAAA  
AAA

**>Soryzae\_PGRP-LBt TRINITY\_DN16375\_c4\_g1\_i4 len=1377**

CGCATCCCCTAAGAACATAGGACATTTCGTTTACAGTGCAGCGAAAAGTATCATTAGTCT  
TATAAGTACCACAATTATTTTATCTTGTATTGATACAGTCGATAAATCTTAGACCGAT  
TTAAATATTTAGGGATTTACTTAACTTCGGGCTTCAGTGTAGTGTAAATAAGTCTGTAAA  
AAAGGTATGTCCAGTAAGCAGTCACGGTCGGTACCCACGCGAGTGTGAGTTGAAAAA  
ATGGAAGAAATTGAAGAGCAAAAAGTCAAATAAATATAGCATCACAGGTTGCTTCACAT  
TACCCCGAGAATTCCTGGAGGAGCTTATTAACAAAATCAAGAATAATTCTAATTGTGACA  
GTGTTAGTCATCGCAGTCATCATATGTGGCACATTTGCGAACAGCTTCGTATGTACAGAC  
CCGGAATAGTTACGAGGGACGAATGGGGTGCCAAACCACCCACAGATGTTGAAAACCTTA  
ACTCTACCAGTTCCTTACGTCGTCATACACCACAGTTATATACCTGCAGCTTGTTCACAA  
AAAGAGGAATGTATAAATGACATGCAATGGATGCAAAAAGTATCATCAACAAAATAATTCA  
TGGTGCATATTGGATATAATTTTCGCTGTTGGAGGGGACAATAGAATTTACGTTGGACGA  
GGTTGGACAGCTGTAGGGGCCACGCTCCCCGTTACAATTCCAGAAGCATTGGAATAGTC  
CTGATAGGAGATTGGACAGATATATTACCCCGAGAGTCAAATGTTAGCAGCAAAACAA  
CTGATTAATATGGGAATCAGAGACGGCTATATAAGTGAAAACACTCAAATTAATTGGGCAT  
AGGCAAGTCCGAGAGACAGCATGTCCAGGAGAAGCATTATATAAGGAGATCCAAATGTGG  
CCTCACTGGATCCCCAACCCCGATGAAGAGGTCATTCCTGTAGTACCTCTAGACAAAGAA  
GACCTTAAACCAGATCCAGAGAAGATCCGGATGCCAGCTTGGCATCTGAAGATAATGAA  
ATTAAACGACATAGTTCTACAGACAAGGATGAAAGTACGTCGAGGAGTATAAAAACATA  
TAAAAACTATCTTCCACTCTAATTGTGTTTAAAAATTATGTTCTTATTAAGCTAATAGA

TCATTA AAAACTTTTTTTTATCAAACATTGAGGTTCACTGGACGAGAAAATTCCAACGTGT  
TGTGTGCAAATATGCTCTCAAAAAAACCTACAGATAGATTTTCGTTATACTCGTATGTATC  
TGAATCCATCAAATAAAGTGATTAACGATATTTATACGACGTTCCATTTTTAAAGTATTT  
TTTAAATCTCTTTGTAAC TATTACTGTCTTTCATTAATAAAGTTCATATCAAAAAAA

**>Soryzae\_PGRP-LBe1 TRINITY\_DN16375\_c4\_g1\_i1 len=1249**

CAGTATTAACAGCATTTCATATCAAATGTAGAAAGAAACAAGACTTAAACGCAAGCTAAAT  
TTGCCAATTC AATGAGTTCTAATTGAATTTTAGTTTTAAAGAGATTTTAAAGATGTAAAA  
ATTGTTAAAAGTTAGTTCCTTCTACAAAAGCCTGTGAATCTAACCAAAGTGATATACTG  
TGATATTTAGTGTGGTTTACTTAATATTTTGTTTAAAATGTGTTATAATATTTGTGTCTT  
GATTTGGGTAATATTGACATGTCATGTTGCGAACAGCTTCGTATGTACAGACCCGGAAAT  
AGTTACGAGGGACGAATGGGGTGCCAAACCACCCACAGATGTTGAAAAC TTA ACTCTACC  
AGTTCCTTACGTCGTCATACACCACAGTTATATACCTGCAGCTTGTTCAACAAAAGAGGA  
ATGTATAAATGACATGCAATGGATGCAAAAAGTATCATCAACAAAATAATTTCATGGTGCGA  
TATTTGGATATAATTTTCGCTGTTGGAGGGGACAATAGAATTTACGTTGGACGAGGTTGGAC  
AGCTGTAGGGGCCACGCTCCCCGTTACAATTCAGAAGCATTGGAATAGTCTTGATAGG  
AGATTGGACAGATATATTACCCCCAGAGAGTCAAATGTTAGCAGCAAAAACAACTGATTAA  
TATGGGAATCAGAGACGGCTATATAAGTGAAAAC TACAATTAATTGGGCATAGGCAAGT  
CCGAGAGACAGCATGTCCAGGAGAAGCATTATATAAGGAGATCCAAATGTGGCCTCACTG  
GATCCCCAACCCCGATGAAGAGGTCATTCCTGTAGTACCTCTAGACAAAGAAGACCTTAA  
ACCAGATCCCAGAGAAGATCCGGATGCCAGCTTGGCATCTGAAGATAATGAAATTAACG  
ACATAGTTCTACAGACAAGGATGAAAGTACGTCGAGGAGTATAAAAACATACATAAAAACT  
ATCTTCCACTCTAATTGTGTTTAAAAAT TATGTTCCCTTATTAAGCTAATAGATCATTAAA  
ACTTTTTTTTATCAAACATTGAGGTTCACTGGACGAGAAAATTCCAACGTGTTGTGTGCA  
AATATGCTCTCAAAAAAACCTACAGATAGATTTTCGTTATACTCGTATGTATCTGAATCCA  
TCAAATAAAGTGATTAACGATATTTATACGACGTTCCATTTTTTAAAGTATTTTTTAAATC  
TCTTTGTAAC TATTACTGTCTTTCATTAATAAAGTTCATATCAAAAAAA

**>Soryzae\_PGRP-LBe2 TRINITY\_DN16375\_c4\_g1\_i3 len=1104**

AATACAATCTTGGCACAGTTTTTCGTTTAGTCGTGTCAAACAAAAACAATTTTCTTATA  
AGTGTCAATTATTATTTGTTAAATGATTTGTTATAGTTTAGTTTCTTTGTACTTGTTCGA  
GTTGCGAACAGCTTCGTATGTACAGACCCGGAAATAGTTACGAGGGACGAATGGGGTGCC  
AAACCACCCACAGATGTTGAAAAC TTA ACTCTACCAGTTCCTTACGTCGTCATACACCAC  
AGTTATATACCTGCAGCTTGTTCAACAAAAGAGGAATGTATAAATGACATGCAATGGATG  
CAAAGTATCATCAACAAAATAATTTCATGGTGCGATATTGGATATAATTTTCGCTGTTGGA  
GGGACAATAGAATTTACGTTGGACGAGGTTGGACAGCTGTAGGGGCCACGCTCCCCGT  
TATAATTCAGAAGCATTGGAATCGTCTGATAGGAGATTGGACAGATATATTACCCCCA  
GAGAGTCAAATGTTAGCAGCAAAAACAACTGATTAATATGGGAATCAGAGACGGCTATATA  
AGTGAAAAC TACAATTAATTGGGCATAGGCAAGTCCGAGAGACAGCATGTCCAGGAGAA  
GCATTATATAAGGAGATCCAAATGTGGCCTCACTGGATCCCCAACCCCGATGAAGAGGTC  
ATTCCTGTAGTACCTCTAGACAAAGAAGACCTTAAACCAGATCCCAGAGAAGATCCGGAT  
GCCAGCTTGGCATCTGAAGATAATGAAATTAACGACATAGTTCTACAGACAAGGATGAA  
AGTACGTCGAGGAGTATAAAAACATACATAAAAACTATCTTCCACTCTAATTGTGTTTAAA  
AATTATGTTCCCTTATTAAGCTAATAGATCATTAAAAC TTTTTTTTATCAAACATTGAGGT  
TCACTGGACGAGAAAATTCCAACGTGTTGTGTGCAAATATGCTCTCAAAAAAACCTACAG  
ATAGATTTTCGTTATACTCGTATGTATCTGAATCCATCAAATAAAGTGATTAACGATATTT  
ATACGACGTTCCATTTTTTAAAGTATTTTTTAAATCTCTTTGTAAC TATTACTGTCTTTCA  
TTAATAAAGTTCATATCAAAAAAA

**>Soryzae\_PGRP-LBe3 TRINITY\_DN16375\_c4\_g1\_i5 len=1127**

CTTTGCACAGTTTTTTCGTTTAAACCGTGTCAAACAACAATCGGTAGTCGAGAGTACCTACA  
CTAACTAATAGTTACAGTTATTTTTTTTACAAGAATACCCATAAAAATGATTAGTTATATTT  
TAGTTATTCTATGTTATTTTTACTGTTGCGAACAGCTTCGTATGTACAGACCCGGAAATAG  
TTACGAGGGACGAATGGGGTGCCAAACCACCCACAGATGTTGAAAACCTAACTCTACCAG  
TTCCTTACGTCGTCATACACCACAGTTATATACCTGCAGCTTGTTCAACAAAAGAGGAAT  
GTATAAATGACATGCAATGGATGCAAAAAGTATCATCAACAAAATAATTTCATGGTGCGATA  
TTGGATATAATTTTCGCTGTTGGAGGGGACAATAGAATTTACGTTGGACGAGGTTGGACAG  
CTGTAGGGGCCACGCTCCCCGTTACAATTCCAGAAGCATTGGAATAGTCCTGATAGGAG  
ATTGGACAGATATATTACCCCCAGAGAGTCAAATGTTAGCAGCAAAAACAACTGATTAATA  
TGGGAATCAGAGACGGCTATATAAGTGAAAACCTACAAATTAATTGGGCATAGGCAAGTCC  
GAGAGACAGCATGTCCAGGAGAAGCATTATATAAGGAGATCCAAATGTGGCCTCACTGGA  
TCCCCAACCCCGATGAAGAGGTCATTCCCTGTAGTACCTCTAGACAAAAGAAGACCTTAAAC  
CAGATCCCAGAGAAGATCCGGATGCCAGCTTGGCATCTGAAGATAATGAAATTAACGAC  
ATAGTTCTACAGACAAGGATGAAAGTACGTGAGGAGTATAAAAACATACATAAAAACCTAT  
CTTCCACTCTAATTGTGTTTTAAAAATTATGTTCCCTTATTAAGCTAATAGATCATTAAAAC  
TTTTTTTTTATCAAACATTGAGGTTCACTGGACGAGAAAATTCCAACGTGTTGTGTGCAAA  
TATGCTCTCAAAAAAACCTACAGATAGATTTTCGTTATACTCGTATGTATCTGAATCCATC  
AAATAAAGTGATTAACGATATTTATACGACGTTCCCTATTTTAAAGTATTTTTTAAATCTC  
TTTGTAAC TATTACTGTCTTTCATTAATAAAGTTCATATCAAAAAA

---

**Sitophilus linearis PGRP-LB transcript sequences**

---

**>Slinearis\_PGRP-LBe1 TRINITY\_DN65546\_c3\_g3\_i7 len=1265**  
CCCCAGCTAAAGTTTTGGCGGGCTTACTTTTTGAACACCCTGTATACATGTAGGCAGTACT  
ATGTAAACTAACAGGTATCTATCTATGAGTAATTAGTAGTTACTTTTTCAACAGCTCTAG  
TGAGAACTGTCGACATTAGCGTCCACTTAAATTTAATATTTATTTGTCTGTGATTACCCGT  
TTGCCCCCCCCCTCCCTCCTTTCAGCATAACCCCGCGCTATATAATAACAGTCGAGG  
ATTCGAAGGCTTAAATTTCAAAGCATTAAACAGCATTTCGTATCAATGGAACATGACTCGAA  
TCCAAACTAAATTTCTATTTTGAATATCTTCCCTCTACAAAAGCTTGTGAAATTTAAACTG  
ATATTTTTTTTTTAAATATGTGTTTATGTGTTACTCTTTGTGCTGTCATTTCTGTAATACTG  
ATCTGTGATGTTGTGAACAGTTTCGTATATCCCGACCCTGAAATTGTTACGAGGGAGGAA  
TGGTGCGCAAAACCGCCACATCCGTTGAGAAATTAACCTTACCCGTCCCTTACGTTGTC  
ATACACCACAGTTATATACCTGCAGCTTGTTACAACAAGGAGGAATGTATAAATGCAATG  
CAATGGATGCAAAAAGTTTCATCAACAAAATCGCTCATGGTGCGATATTGGATAACAATTC  
GCTGTTGGAGGGGATAACAGAAATATACGTGGGAAGGGGATGGACGGCCGTGGGCGCCAC  
GCCCCCTTTATAATACCAAAGCATGGGCATCGTCCCTAATAGGAAATGGGAAGATATA  
TTACCCCCAGAGAGTCAAATGTTAGTAGCGAAACAATTGATTAATATGGGAATCAGAGGT  
GGCTATATAAGTAAAAACTACAAATTAATTGGGCACAGGCAAGTCCGAGAAACAGTATGT  
CCAGGACAAGCGTTATATGAGGAGATCCAAACGTGGCCCCACTTTACAGAAAATCCCACT  
CTGGAGATTCGTCGAGACGTTCCCGTTTCCCTAGACAAAAGACATGTTAAACCTGATCCT  
AGAGAGGAATTCGATGCCAGATTATCATTTGAAAATAATCAAGTACGAAGACGGAGTTCT  
ATAAATAAAGAATAAATTTACTGAGTTCAAGTCAGTGTTTTTGTATAACACAAATATG  
TATATGTTCTCAGAAAAGTACTTACAAATTTGATATAGTATAGTTGAATAATAAGCCGC

TTAACAATGTTTATATAACATTCTAAATTTATGTTTTAAATAATTGTTGTAACCATTTCT  
ATCTT

**>Slinearis\_PGRP-LBe2 TRINITY\_DN65546\_c3\_g3\_i5 len=1310**

AAGGTAGTCACACGCGTACACTTTTTTCTATCGAGCTAAAACGCGATCTGGAGTCCTCC  
AATAATCTTTGGAAAGTATTTGAAGGTTATTTTTAAACATTTAATGTAGCATTTGAATCT  
CCACAGACAGGCTCAAGGACTTCACCATATCCTTTTAGAAATATCTCAAGACTTGTACCG  
CAGGTAATCCAAACGCTTAGAAAAAACTCTATGTGTGTGGCTACATTTATATCTTTTCGAG  
AACCAATCGAAGTCGCCGAATTACAGGAAATTTTCATTTTATTTTTTCATCGAGTGTGATA  
AAAATAATCTATTTAATAAAAAATAATCATAATCTGGAAACAGTTTTTCTATAATCGTACC  
TAATAACAATCTACAAGCTACCTAGAGTAGTTATAGTTGAAAAAAGTTAAATTTTTTAAAT  
TTAGAAATACCCACGATGATTAATTATATTTTTGCTGTTTTATGTTATTTTAAATGTTGTG  
AACAGTTTCGTATATCCCGACCCGAAATTGTTACGAGGGAGGAATGGTGCGCAAACCG  
CCCACATCCGTTGAGAAATTAACCTACCCGTCCTTACGTTGTCATACACCACAGTTAT  
ATACCTGCAGCTTGTTACAACAAGGAGGAATGTATAAATGCAATGCAATGGATGCAAAG  
TTTCATCAACAAAATCGCTCATGGTGCATATTGGATAACAATTCGCTGTTGGAGGGGAT  
AACAGAATATACGTGGGAAGGGGATGGACGGCCGTGGGCGCCCACGCCCCCTTTATAAT  
ACCAAAGCATGGGCATCGTCCTAATAGGAAATGGGAAGATATATTACCCCCAGAGAGT  
CAAATGTTAGTAGCGAAACAATTGATTAATATGGGAATCAGAGGTGGCTATATAAGTAAA  
AACTACAAATTAATTGGGCACAGGCAAGTCCGAGAAACAGTATGTCCAGGACAAGCGTTA  
TATGAGGAGATCCAAACGTGGCCCCACTTTACAGAAAATCCCCTCTGGAGATTCGTCTGA  
GACGTTCCCGTTTCCCTAGACAAAGAACATGTTAAACCTGATCCTAGAGAGGAATTCGAT  
GCCAGATTATCATTTGAAAATAATCAAGTACGAAGACGGAGTTCTATAAATAAAGAATAA  
ATTTACACTGAGTTCAAGTCAGTGTTTTTGTATAACACAAATATGTATATGTTCTCAGAA  
AAAGTACTTACAAATTTGATATAGTATAGTTGAATAATAAGCCGCTTAACAATGTTTATA  
TAACATTCTAAATTTATGTTTTAAATAATTGTTGTAACCATTTCTATCTT



### Supplementary references

1. Sievers, F. *et al.* (2011). Fast, scalable generation of high-quality protein multiple sequence alignments using Clustal Omega. *Mol. Syst. Biol.* *7*, 539–539.
2. Vallier, A., Vincent-Monégat, C., Laurençon, A., and Heddi, A. (2009). RNAi in the cereal weevil *Sitophilus* spp: systemic gene knockdown in the bacteriome tissue. *BMC Biotechnol.* *9*, 44.
3. Martin, M. (2011). Cutadapt removes adapter sequences from high-throughput sequencing reads. *EMBnet.journal* *17*, 10.
4. Grabherr, M.G. *et al.* (2011). Full-length transcriptome assembly from RNA-Seq data without a reference genome. *Nat. Biotechnol.* *29*, 644–652.
5. Altschul, S.F., Gish, W., Miller, W., Myers, E.W., and Lipman, D.J. (1990). Basic local alignment search tool. *J. Mol. Biol.* *215*, 403–410.
6. Vigneron, A. *et al.* (2014). Insects recycle endosymbionts when the benefit is over. *Curr. Biol.* *24*, 2267–73.
7. Balmand, S., Lohs, C., Aksoy, S., and Heddi, A. (2013). Tissue distribution and transmission routes for the tsetse fly endosymbionts. *J. Invertebr. Pathol.* *112 Suppl*, S116–22.
8. Singh, S.R., Liu, W., and Hou, S.X. (2007). The adult *Drosophila* malpighian tubules are maintained by multipotent stem cells. *Cell Stem Cell* *1*, 191–203.
9. Anselme, C. *et al.* (2008). Identification of the weevil immune genes and their expression in the bacteriome tissue. *BMC Biol.* *6*, 43.
10. Vigneron, A. *et al.* (2012). Host gene response to endosymbiont and pathogen in the cereal weevil *Sitophilus oryzae*. *BMC Microbiol.* *12 Suppl 1*, S14.
11. Maire, J., Vincent-Monégat, C., Masson, F., Zaidman-Rémy, A., and Heddi, A. (2018). An IMD-like pathway mediates both endosymbiont control and host immunity in the cereal weevil *Sitophilus* spp. *Microbiome* *6*, 6.
12. Masson, F. *et al.* (2015). Weevil endosymbiont dynamics is associated with a clamping of immunity. *BMC Genomics* *16*, 819.
13. Lemaitre, B., and Hoffmann, J. (2007). The Host Defense of *Drosophila melanogaster*. *Annu. Rev. Immunol.* *25*, 697–743.
